1      **Motor effort and adaptive sampling in perceptual decision-making**

2

3

4

5      Tianyao Zhu<sup>1\*</sup>

6

7

8

9      <sup>1</sup>Faculty of Education and Psychology, Eötvös Loránd University, Budapest, Hungary

10

11

12

13      \* Corresponding author

14      E-mail: [tianyao.a.zhu@gmail.com](mailto:tianyao.a.zhu@gmail.com) (TZ)

15

## 16 **Abstract**

17           People usually switch their attention between the options when trying to make a decision.  
18 In our experiments, we bound motor effort to such switching behavior during a two-alternative  
19 perceptual decision-making task and recorded the sampling patterns by computer mouse cursor  
20 tracking. We found that the time and motor cost to make the decision positively correlated to  
21 the number of switches and increased with the difficulty of the task. Specifically, the first and  
22 last sampled items were decided in an attempt to minimize the overall motor effort during the  
23 task, and both were manipulatable by biasing the relevant motor cost. Moreover, the last  
24 sampled item was more likely to be chosen, and the cumulative sampling amount also biased  
25 to the chosen item during the later phase of the sampling. Assuming that attention switching is  
26 independent of the decision variable, conventional attentional drift-diffusion model (aDDM)  
27 was inadequate to explain the size of the last-sampling bias in our experimental conditions.  
28 Meanwhile, our Bayesian Network analysis showed that the causal relationship between  
29 attention and decision is bidirectional. We concluded that the sampling behavior during  
30 perceptual decision-making is actively adapted to the motor effort in the specific task settings,  
31 as well as the temporary decision.

32

## 33 **Introduction**

34           When people try to make a decision between two similar products in a shopping center,  
35 they often approach each shelf on which the products are displayed, or even pick them up to  
36 have a closer look. If the choice is really difficult to make, people may walk back-and-forth the  
37 two shelves for a long time. Many people will start by examining the product around the  
38 entrance of the shop, but eventually choose the one near the checkout counter to save some

39 effort. This daily example indicates that our decisions are not solely shaped by the objective  
40 values of the alternatives, but also other factors including the motor effort related to the  
41 sampling and action execution processes. However, sensorimotor aspects have not been  
42 integrated into decision-making studies until recently. It is still an on-going controversy  
43 whether action is part of decision-making: According to the Embodied Choice model, action  
44 execution is part of the decision-making process rather than merely a means to report the  
45 decision; in other words, action can feed back into the decision-making [1]. Under such  
46 guidance, studies have been trying to examine decision-making through analyzing movement  
47 patterns [2] as well as to seek neural imaging evidence on the involvement of sensorimotor  
48 system during decision-making [3]. On the other hand, Aczel et al. [4] argued that the observed  
49 bias in decisions was caused by the difference in motor effort needed during action, not by the  
50 movement toward one of the options as the Embodied Choice model proposed. There have been  
51 several studies focusing on the influence of motor effort during action upon decision-making:  
52 Perceptual decision-making has been reported to be biased to the choice associated with less  
53 motor cost to respond [5], and such bias still exists in subsequent decisions when no motor  
54 effort difference is present [6]. De Lange and Fritsche [7] suggested that motor cost can  
55 influence decision-making in a similar manner to rewards. In addition, motor effort can also  
56 affect changes of mind during decision-making [8]. However, no investigation has been focused  
57 on the motor effort related to the sampling behavior: Although in some studies two or more  
58 spatially separated visual stimuli were used as choices during the task, the main form of  
59 movement involved during sampling was the eye movement (saccade), of which time cost  
60 instead of energy cost seems to be the major consideration [9].

61 Another issue following the separation of the alternatives in space is the attention  
62 allocation during sampling. Typically, the decision-maker switches his attention (behaviorally  
63 shown as switching the gaze) between the options at least once, and sometimes multiple times.

64 What is the relationship between attention and decision-making? Shimojo et al. [10] proposed  
65 that the bias in gazing behavior during sampling can both reflect and influence preference  
66 decision: such gaze bias to the finally chosen item is continually reinforced, which was named  
67 the gaze cascade effect. Other results that manipulations in attention biased choices have been  
68 reported as well [11-15], but there is rare evidence supporting that temporary choices can  
69 influence attention allocation. Under the assumption that attention can influence value  
70 integration during decision-making, the attentional drift-diffusion model (aDDM) was  
71 proposed [16]. Unlike the traditional drift-diffusion model, in which the relative evidence  
72 accumulates at a constant rate (the drift rate) within one decision, the aDDM allows the drift  
73 rate to change with attention: the option currently being attended (gazed at) shall receive more  
74 evidence. Such model has successfully explained the gaze patterns and several gaze-related  
75 biases in preference-based and perceptual decisions performed by human subjects [16, 17, 18].  
76 Specifically, the aDDM assumes that the attention or gaze switches between the options  
77 randomly. Previously reported gaze cascade effect that preference affects attention can be  
78 readily explained by aDDM. Therefore, Krajbich [19] suggested that gaze or attention have a  
79 causal effect on choice, but not vice versa.

80 Under natural circumstances, humans actively gather information with attention and  
81 active sensing behaviors (shift of gaze and assisting limb/body movement) to sample relevant  
82 cues [20]. Sampling behavior itself can be regarded as a low-level decision-making process  
83 about what information to acquire, as well as where and when [21]. In this study, we aim to  
84 figure out the factors influencing sampling patterns during a basic perceptual decision-making  
85 task, especially how sampling behavior is adapted to the expected motor effort given the  
86 specific environment where the task is performed. We designed a paradigm in which motor  
87 effort was bind to the sampling and action execution processes, and manipulated the expected  
88 motor cost to examine corresponding changes in the sampling patterns. Additionally, we tested

89 the causal relationship between the temporary decision and the attention allocation strategy  
90 during sampling by stimulating an aDDM and analyzing a Bayesian Network model.

91

## 92 **Results**

93 The visual stimuli in the task were two groups of black and white dots positioned  
94 separately at the left and the right side of the screen, and subjects were asked to decide in which  
95 group there were more white dots than in the other. In order to bind motor effort to the sampling  
96 process, we applied an artificial rule that ‘the sampling quality is in proportion to the distance  
97 between the agent and the alternative choice’, which in natural circumstances can be interpreted  
98 as ‘the closer one gets to look at an object, the more details can be seen’, and ‘getting closer’  
99 needs motor effort. During sampling, a number of randomly selected dots were made invisible  
100 in each frame, and the number was in proportion to the distance between the cursor and each  
101 dot stimulus (Fig 1A). In this way, to get better sampling quality, subjects must make some  
102 motor effort to move the cursor closer to the stimulus they want to examine. The start position  
103 was randomly set between the two stimuli, and subjects were instructed to drag the cursor onto  
104 that position to initiate each trial. The motor effort in the action stage took the form of moving  
105 the cursor to the corresponding choice button placed below the dot stimuli on the screen and  
106 clicking on it to make the choice. We set two types of tasks: In the first type, the choice buttons  
107 were horizontally centered (Fig 1A), so the two stimuli were equally close to them, which made  
108 the motor effort required to move the cursor from each stimulus to the buttons approximately  
109 the same. In the second type, the choice buttons were positioned below the right stimuli (Fig  
110 1B), so that the right stimulus was closer to them than the left one, thus the required motor  
111 effort would be less if the right one was last sampled.

112

113 **Fig 1. Binding motor effort to the sampling and action execution stages of the decision-**  
114 **making task. (A)** The level of invisibility of each stimulus is in proportion to the distance  
115 between the current position of the mouse cursor and the two stimuli. The choice buttons are  
116 horizontally centered, so the distance from the two stimuli to the buttons are approximately the  
117 same. **(B)** The choice buttons are horizontally biased to the right, so the distance from the right  
118 stimulus to the buttons is shorter than that from the left.

119

## 120 **General Sampling Patterns**

121 We plotted the horizontal mouse cursor position recorded during the sampling period at  
122 each time point. Fig 2 shows the typical cursor position time series from a single block for one  
123 of the subjects. The 60 trials in the block were sorted by the start position. The length between  
124 the two stimuli was linearly mapped to a 0-to-1 scale and shown in a red-blue color gradient.  
125 The graph implies that the typical sampling pattern was to switch the cursor once or multiple  
126 times between the two stimuli. The cursor paused mostly at either the left-most or right-most  
127 part, which means only one of the stimulus was clearly visible at the time. Therefore, we can  
128 make the assumption that the eye gaze and the attention of the subject switched between the  
129 stimuli together with the cursor, which enables the comparison of our paradigm and former  
130 sequential sampling tasks and models.

131

132 **Fig 2. Horizontal mouse cursor position plotted as time series during the trials.** Data is  
133 from a single block (60 trials) performed by one subject and sorted by the start position in each  
134 trial. Red color indicates the cursor is currently positioned more to the right stimulus, while  
135 blue indicates left.

136

137 Under this sampling pattern, if a subject made  $n$  switches in a trial, there would be  $n+1$   
138 periods of sampling alternatively assigned to the two stimuli. Assuming that each sampling  
139 period has approximately the same duration, the total decision time (elapsed time from the  
140 beginning of the trial to when the decision is made, excluding the time to execute the action)  
141 should be correlated to the number of switches. On the other hand, most of the motor effort  
142 during sampling was spend on the switching movement, and a typical switch would be moving  
143 the cursor from the left stimulus to the right, the distance between them fixed. Therefore, the  
144 total motor effort during the trials, measured by the total horizontal moving distance of the  
145 cursor on the screen, should be correlated to the number of switches, too. Based on this, in order  
146 to minimize the time and motor cost during sampling, subjects should make as few switches as  
147 possible. The actual behavioral results well matched our analysis: Fig 3A plots the number of  
148 switches made in all trials across the subjects in a histogram. In 42.5% trials only one switch  
149 was made, and the percentage of trials got lower when more numbers of switches were made.  
150 Moreover, the proportion of trials with higher distinctions between the two stimuli was larger  
151 among the trials with fewer switches than among those with more switches. Fig 3B and 3C  
152 show that the decision time and the total horizontal moving distance of the cursor correlated to  
153 the number of switches significantly (Spearman's  $\rho = 0.71$ ,  $P = 2.0 \times 10^{-148}$  for decision time  
154 and  $\rho = 0.84$ ,  $P = 3.7 \times 10^{-261}$  for horizontal moving distance). The results are in accordance with  
155 the speed-energy-accuracy trade-off rule: in order to maintain high accuracy in the perceptual  
156 decision-making task, subjects would invest more time and motor cost when the task was more  
157 difficult.

158

159 **Fig 3. Number of switches between the stimuli, and its correlation to decision time and the**  
160 **total horizontal moving distance of the cursor on the screen during the trials. (A)**

161 Histogram of the number of switches in all trials, colors indicating the absolute distinction

162 between the two choices. **(B)** Correlation of decision time and number of switches during the  
163 trials. Spearman's  $\rho = 0.71$ ,  $P = 2.0 \times 10^{-148}$ . **(C)** Correlation of total horizontal moving distance  
164 of the cursor and number of switches during the trials. Spearman's  $\rho = 0.84$ ,  $P = 3.7 \times 10^{-261}$ .  
165 Error bars show 95% confidence intervals for data pooled across all subjects.

166

## 167 **Influences of Motor Cost on Sampling Patterns**

168         Apart from the general influence of task difficulty on the number of switches during  
169 sampling, the difference in motor cost depending on the start position and the choice button  
170 position can also affect sampling patterns. In the centered choice button condition and the right  
171 biased choice button condition, the psychometric choice curves (Fig 4A) were not significantly  
172 different, and the overall accuracy was also very similar (90.4% for centered choice button task  
173 and 91.5% for right biased choice button task). As the absolute distinction between the two  
174 choices increased, the number of switches (Fig 4B, Spearman's  $\rho = -0.41$ ,  $P = 2.6 \times 10^{-40}$  for  
175 centered condition and  $\rho = -0.37$ ,  $P = 4.0 \times 10^{-33}$  for right biased condition), decision time (Fig  
176 4C, Spearman's  $\rho = -0.28$ ,  $P = 7.4 \times 10^{-19}$  for centered condition and  $\rho = -0.46$ ,  $P < 10^{-300}$  for  
177 right biased condition) and horizontal moving distance (Fig 4D, Spearman's  $\rho = -0.35$ ,  $P =$   
178  $1.7 \times 10^{-28}$  for centered condition and  $\rho = -0.35$ ,  $P = 2.3 \times 10^{-29}$  for right biased condition) in the  
179 trials all decreased, but there were no significant difference between the centered and right  
180 biased conditions. Fig 4E shows the psychometric curves for the first sampled stimulus. The  
181 subjects tended to sample the stimulus closer to the start position in the trial, but with a  
182 systematic bias (usually to the left stimulus). This bias may be related to the cultural habit of  
183 dealing with items from left to right, for example while reading people usually start from the  
184 left. In the centered choice button condition, moving firstly to the stimulus closer to the start  
185 position would minimize the total horizontal moving distance during sampling. However, when



186 the choice buttons were biased to the right stimulus, if the subject expected to make only one  
187 switch (which was most likely, see Fig 3A), the sampling strategy to minimize motor cost would  
188 be to go for the left stimulus first and then the right, finally taking the shorter path from the  
189 right stimulus to the choice buttons. Such additional bias to sample the left stimulus first when  
190 the choice buttons were biased to the right was indeed observed in subjects' behavior (Fig 4E).  
191 Regardless of the previous sampling sequence, it would always take less motor effort to execute  
192 the action if the subject sampled the right stimulus lastly in the right biased choice button  
193 condition. Fig 4F shows that subjects were more likely to sample the right stimulus last in the  
194 right biased choice button condition compared to the centered condition. Such a tendency was  
195 more significant for the trials in which the distinctions between the choices were low. In  
196 summary, the attempt to minimize motor cost during sampling as well as action execution can  
197 influence which stimulus to sample firstly and lastly.

198

199 **Fig 4. Psychometrics for centered choice button task versus right biased choice button**  
200 **task. (A)** Psychometric choice curves. **(B)** Number of switches between the stimuli. Spearman's  
201  $\rho = -0.41$ ,  $P = 2.6 \times 10^{-40}$  for centered condition and  $\rho = -0.37$ ,  $P = 4.0 \times 10^{-33}$  for right biased  
202 condition. **(C)** Decision time. Spearman's  $\rho = -0.28$ ,  $P = 7.4 \times 10^{-19}$  for centered condition and  
203  $\rho = -0.46$ ,  $P < 10^{-300}$  for right biased condition. **(D)** Total horizontal moving distance of the  
204 cursor. Spearman's  $\rho = -0.35$ ,  $P = 1.7 \times 10^{-28}$  for centered condition and  $\rho = -0.35$ ,  $P = 2.3 \times 10^{-29}$   
205 for right biased condition. **(E)** First sampled psychometric curves. **(F)** Last sampled choice bias.  
206 Significance levels are based on unpaired one-tail  $t$ -test,  $*P < 0.05$ ,  $***P < 0.001$ . Error bars  
207 show 95% confidence intervals for data pooled across all subjects. Shaded error bars show 95%  
208 confidence intervals based on generalized linear model fitting.

209

## 210 **Choice Biases Related to Sampling Processes**

211           Firstly, the aDDM predicts a last-sampling bias, which means that subjects are more  
212 likely to choose the last sampled stimulus. That is because the discounted rate of evidence  
213 accumulation for the stimulus not being sampled will lead to the result that the decision variable  
214 is more likely to reach the barrier at the last sampled side [16]. Such bias has been reported in  
215 a number of human decision-making studies of both value-based and perceptual decisions [16,  
216 18]. However, the causal relationship behind the last-sampling bias is not completely clear:  
217 While the aDDM assumes that the current decision variable has no backward influence upon  
218 sampling patterns, there is rare evidence supporting or contradicting the causal effect of the  
219 temporary decision on the attention allocation during sampling [19].

220           In order to test whether the subjects tended to choose the particular stimulus because  
221 they sampled it lastly, or the subjects tended to sample the particular stimulus lastly because  
222 they wanted to choose it, or both, we set up a new type of sampling mode: The subjects should  
223 and could only make one switch between the stimuli, which means they had only one chance  
224 to sample each of the alternatives. The time to examine each stimulus was not limited, though.  
225 In this condition, the last sampled item would have been already decided when the subject  
226 started to sample the first stimulus, therefore it cannot be affected by the decision variable later.  
227 We built an aDDM and fitted its parameters to the behavioral data in the unlimited-switch mode,  
228 then we compared the size of the last-sampling bias in the unlimited- and one-switch sampling  
229 mode for human behavior and model output.

230           As Fig 5 shows, the aDDM fitted the basic psychometrics including the choice curve  
231 (Fig 5A), decision time (Fig 5B) and the number of switches (Fig 5C) in the unlimited-switch  
232 mode generally well. In the one-switch mode (Fig 5D and 5E), the decision time of the model  
233 output was similar to that of the human behaviors, but note that the overall accuracy (79.9%)

234 was lower compared to behavioral data (89.1%). In fact, the human subjects' overall accuracy  
235 in the one-switch condition was not reduced obviously compared to that in the unlimited-switch  
236 condition (90.4%). This result is quite surprising, for in the one-switch mode the decision time  
237 was shorter, and this normally should lead to lower accuracy. If the accuracy has not been  
238 significantly improved by making further switches, which would cost extra time and energy,  
239 why would the subject make them? One possible reason is that subjects would like to check the  
240 previously sampled stimuli again to verify their preliminary decision [22], which would  
241 increase the confidence in their decision.

242

243 **Fig 5. Psychometrics for human subjects' behavioral data versus fitted aDDM output. (A)**  
244 Psychometric choice curves in the unlimited-switch task. **(B)** Decision time in the unlimited-  
245 switch task. **(C)** Number of switches in the unlimited-switch task. **(D)** Psychometric choice  
246 curves in the one-switch task. **(E)** Decision time in the one-switch task. Error bars show 95%  
247 confidence intervals for data pooled across all subjects. Shaded error bars show 95% confidence  
248 intervals based on generalized linear model fitting.

249

250 We then compared the last-sampling bias in our model output and that in the subjects'  
251 behavioral data: In the unlimited- and one-switch mode, both human behavior and model output  
252 exhibited a bias to choose the last sampled stimulus (Fig 6). However, in the unlimited-switch  
253 mode, the bias size for model output was smaller than human behavior: When the distinction  
254 between the two choices was zero, the difference in the fitted probability of choosing right when  
255 right was last sampled versus when left was last sampled ( $\Delta p$ ) was 0.59 for human subjects but  
256 only 0.27 for the model (Fig 6A). Such deducted size of the last-sampling bias in fitted aDDM  
257 compared to human data has also been reported in another perceptual decision-making study,  
258 where  $\Delta p = 0.51$  for human data and  $\Delta p = 0.26$  for aDDM [18]. Moreover, compared to the

259 unlimited-switch mode, the size of the last-sampling bias decreased for human behavior ( $\Delta p =$   
260 0.30) but increased for model output ( $\Delta p = 0.47$ ) when only one switch was allowed (Fig 6B).

261

262 **Fig 6. Last-sampling bias for human subjects' behavioral data versus fitted aDDM model**  
263 **output. (A)** Last-sampling bias in the unlimited-switch mode. **(B)** Last-sampling bias in the  
264 one-switch mode. Shaded error bars show 95% confidence intervals based on generalized linear  
265 model fitting.

266

267 To quantify the size of the last-sampling bias, we built a Bayesian Network model  
268 depicting the causal relationship between the last sampled item and the decision.

$$\begin{aligned} & p(\text{right last chosen} | \text{right last sampled}) \\ 269 & = \int p(\text{right chosen} | \mathbf{DV}, \text{right last sampled}) p(\mathbf{DV} | \text{right last sampled}) d\mathbf{DV} \quad (2) \\ & = \int p(\text{right chosen} | \mathbf{DV}, \text{right last sampled}) \frac{p(\text{right last sampled} | \mathbf{DV})}{p(\text{right last sampled})} p(\mathbf{DV}) d\mathbf{DV} \end{aligned}$$

270 Equation (1) gives the general form of conditional dependence relationship behind the last-  
271 sampling bias:  $p(\text{right chosen} | \text{right last sampled})$  is the probability of choosing the right item  
272 given that the right item is last sampled.  $\mathbf{DV}$  is the decision variable at the time the last sampling  
273 starts, and  $p(\mathbf{DV})$  is its prior distribution. When the distinction between the two choices is 0,  
274 the expected  $\mathbf{DV}$  is also 0. If the subjects have a tendency to choose the last sampled item,  
275  $p(\text{right chosen} | \mathbf{DV}, \text{right last sampled})$  should be higher. On the other hand, if the subjects  
276 have a tendency to sampled the item that the current decision variable biases to, the likelihood  
277  $p(\text{right last sampled} | \mathbf{DV})$  should be higher when  $\mathbf{DV}$  is closer to the right barrier and lower  
278 when  $\mathbf{DV}$  is closer to the left barrier.  $p(\text{right last sampled})$  can be regarded as a constant value  
279 irrelevant to  $\mathbf{DV}$ .

280 Altogether, there are three possible hypotheses regarding the causal relationship  
 281 between the last sampled item and the decision: Fig 7A displays the graphical models for these  
 282 hypotheses. Model (a) as well as the aDDM assumes that the final decision is dependent on the  
 283 last sampled item, but the last sampled item is independent of the decision variable. In the  
 284 aDDM, for each given  $DV$ ,  $p(\text{right chosen} | DV, \text{right last sampled})$  is decided by the value  
 285 scaling parameter  $d$ , the noise level parameter  $\sigma$  and the discounting parameter  $\theta$  for the  
 286 unattended item, and the mean is higher than 0.5. Since the last sampled item is independent of  
 287  $DV$ , we have:

$$288 \quad \begin{aligned} & p(\text{right chosen} | \text{right last sampled}) \\ & = \int p(\text{right chosen} | DV, \text{right last sampled}) p(DV) dDV \end{aligned} \quad (3)$$

289 Therefore, the bias is solely due to the term  $p(\text{right chosen} | DV, \text{right last sampled})$ . In the one-  
 290 switch mode, the elapsed time before the last sampling is shorter, thus  $p(DV)$  will have smaller  
 291 variance so that  $p(\text{right chosen} | \text{right last sampled})$  will become even larger, which is in  
 292 accordance with the actual model stimulation results (Fig 6B). Similarly, the value of  $p(\text{right}$   
 293  $\text{chosen} | \text{right last sampled})$  should be the same for centered and biased choice buttons. However,  
 294 if we assume that the last sampled item is dependent on  $DV$  but the final decision is independent  
 295 of the last sampled item, as in Model (b), we shall have:

$$296 \quad \begin{aligned} & p(\text{right last chosen} | \text{right last sampled}) \\ & = \int p(\text{right chosen} | DV) \frac{p(\text{right last sampled} | DV)}{p(\text{right last sampled})} p(DV) dDV \end{aligned} \quad (4)$$

297 In this model, the bias is due to the term  $p(\text{right last sampled} | DV)$  instead, while the term  
 298  $p(\text{right chosen} | DV)$  is unbiased. If only one switch is allowed, the last sampled item can no  
 299 longer depend on  $DV$ , so we have:

$$300 \quad p(\text{right last chosen} | \text{right last sampled}) = \int p(\text{right chosen} | DV) p(DV) dDV \quad (5)$$

301 And the mean of  $p(\text{right chosen} \mid \text{right last sampled})$  will fall back to 0.5. In the biased choice  
302 button task, the last sampled item depends on not only  $DV$  but also motor cost considerations,  
303 so the slope of likelihood  $p(\text{right last sampled} \mid DV)$  will become smaller compared to the  
304 centered choice button condition, resulting in the reduced bias size in  $p(\text{right chosen} \mid \text{right last}$   
305  $\text{sampled})$ . Finally, model (c) shows a third possibility that the last sampled item is dependent  
306 on  $DV$ , and the final decision is also dependent on the last sampled item. In this model the  
307 mathematical expression takes the full form in Equation (1), and the total bias in  $p(\text{right chosen}$   
308  $\mid \text{right last sampled})$  has two sources: The last sampled item is more likely to be chosen, so  
309  $p(\text{right chosen} \mid DV, \text{right last sampled})$  is biased; the currently winning item is more likely to  
310 be last sampled, so  $p(\text{right last sampled} \mid DV)$  is also biased. Under such an assumption, in the  
311 one-switch mode the last-sampling bias should still exist because the term  $p(\text{right chosen} \mid DV,$   
312  $\text{right last sampled})$  is biased, but the size will decrease because the term  $p(\text{right last sampled} \mid$   
313  $DV)$  now disappears. In the biased choice button task, the bias will also become smaller because  
314 the last sampled item is now dependent on an extra factor related to the motor cost. Fig 7B  
315 shows  $p(\text{right chosen} \mid \text{right last sampled})$  for human subjects' behavioral data in the three  
316 experimental conditions: Compared to the centered unlimited-switch condition, in the one-  
317 switch mode  $p(\text{right chosen} \mid \text{right last sampled})$  decreased but was still higher than 0.5 when  
318 the distinction between choices was zero, while in the right biased button task the size of the  
319 last-sampling bias also decreased. Among the three hypotheses, only Model (c) correctly  
320 predicted the behavior of the subjects. Therefore, we drew the conclusion that the causal  
321 relationship between sampling patterns and the decision is bidirectional.

322

323 **Fig 7. Causal relationship for the last-sampling bias.** (A) Graphical models for possible  
324 hypotheses of the conditional dependence relationship between the last sampled stimulus and  
325 the decision. Arrows show dependency between the events or variables, and dashed arrows

326 show dependency assumed to exist in the model, but made impossible under certain  
327 experimental conditions. **(B)** Probability of choosing the right item given the right item is last  
328 sampled for human subjects' behavioral data. The last-sampling bias exists in all three  
329 conditions, but the size is smaller in one-switch and right-biased choice button tasks. Shaded  
330 error bars show 95% confidence intervals based on generalized linear model fitting.

331

332 In addition, the aDDM also predicts that the subjects are more likely to choose the  
333 stimulus with longer overall sampling time. In our paradigm, the noise level for the stimuli is  
334 varying during the trial, therefore we changed the sampling time length to the cumulative  
335 sampling amount (CSA), which is defined as the integral of the proportion of visible dots with  
336 respect to time for each stimulus. Instead of focusing merely on the overall sampling amount,  
337 we studied the time course of the correlation between the CSA and the final choice: We plotted  
338 the odds ratio ( $N_{\text{left CSA larger, left chosen}} \cdot N_{\text{right CSA larger, right chosen}} \cdot N_{\text{left CSA larger, right chosen}}^{-1} \cdot N_{\text{right CSA larger, left chosen}}^{-1}$ , in which  $N$  is the number of trials across all subjects) for the three experimental  
339 conditions as time series in Fig 8. Note that the average finishing time of the first sampling is  
340 at 1345 ms, and the second sampling at 2256 ms. There are a few interesting phenomena shown  
341 in the results: First, only in the unlimited-switch mode with centered choice buttons the overall  
342 CSA was significantly correlated to the final choice. Second, such correlation became  
343 significant only in the later period of the sampling process. Third, in the one-switch mode,  
344 subjects tended to sample the stimulus with fewer white dots (the wrong choice) first and save  
345 the stimulus with more white dots (the correct choice) for the second, which is also the last  
346 sampling. As a result, there was a significant negative correlation between the first sampled  
347 stimulus and the final choice in the one-switch mode, which was not found in the other two  
348 conditions. Recall that the further switches made in the sampling process have not improved  
349 the accuracy of the decision much. Combined with the fact that the extra sampling was mostly  
350

351 spent on the finally chosen stimulus (but the decision has already formed after the first two  
352 samplings), we deduce that sampling patterns in the later period depend on the preliminary  
353 decision: Subjects will make extra switches to and spend extra time dwelling on the  
354 predetermined choice in order to verify their decision. Moreover, when the subjects know in  
355 advance that only one switch can be made, even the earlier period of the sampling process can  
356 be influenced by the decision variable. However, other factors, for example motor cost  
357 considerations can disrupt such verifying sampling behavior.

358

359 **Fig 8. Correlation of the cumulative sampling amount and the final choice plotted as**  
360 **functions of the elapsed time in the trials. (A)** Odds ratio of choosing the stimulus with higher  
361 cumulative sampling amount till the specific time point in the trials versus not choosing it. **(B)**  
362 The first 2000 ms enlarged. **(C)** Proportion of trials already ended before the specific time point.

363

## 364 Discussion

365 In summary, the adaptive sampling behavior during perceptual decision-making  
366 exhibits the following patterns: First, the number of switches between the alternatives as well  
367 as the total time and motor cost during sampling is related to the difficulty of the task: the more  
368 difficult the task is, the more times the stimuli are resampled. Second, the sampling order  
369 depends on the start position and the choice button position in an attempt to minimize the total  
370 moving distance of the mouse cursor. Third, attention biases to the eventually chosen item  
371 during the later phase of the sampling. Combining the modeling results, we conclude that the  
372 sampling pattern is shaped by both motor cost and the current decision. We integrate our  
373 findings into the previous framework and draw a new model for decision-making process  
374 considering motor effort during sampling and action (Fig 9): (b) *The current decision variable*



375 *influences sampling patterns* and (e) *motor cost influences sampling patterns* together depict  
376 the adaptive nature of sampling during decision-making.

377

378 **Fig 9. Model for decision-making process considering the motor effort in both sampling**  
379 **and action. (a)** Sampling patterns influence the decision. **(b)** The current decision variable  
380 influences sampling patterns. **(c)** The final decision is translated into action. **(d)** Action  
381 properties influence the decision. **(e)** Motor cost influences sampling patterns. **(f)** Motor cost  
382 influences action.

383

384 Wispinski et al. [23] reviewed recent computational models, behavioral studies and  
385 neural recordings, and drew the conclusion that decision-making is a continuous process from  
386 the presentation of behaviorally relevant options until movement completion. Previous studies  
387 suggested that motor effort related to the action phase can influence the decision [4-6, 8], and  
388 our results expand the conclusion to that the sampling behavior can also be influenced by motor  
389 effort related to both sampling and action. It further supports the idea that sensorimotor aspects  
390 should be considered as an actively integrated part of the decision-making process. However,  
391 while our manipulation of motor effort biased the last sampled item, it did not bias the choices  
392 made by the subjects. One possible reason is that the choice is not relevant to the motor effort  
393 difference in the task; another possibility is that explicit knowledge of the motor cost will help  
394 to avoid integrating irrelevant factors into the decision to maintain high accuracy [24]. In  
395 addition, there are several studies focusing on the representation of motor effort and how it is  
396 related to cost minimization in decision-making as well as motor control [25, 26]. Future studies  
397 may further quantify the effect of motor cost on decision-making based on similar methods.

398           The relationship between attention and eye movement during decision-making has been  
399 studied abundantly [27], but researches that highlight limb and body movements during the  
400 sampling process are rare, even though in naturalistic circumstances such movements usually  
401 accompany and cooperate with eye movements in order to get best sampling of information. In  
402 our research, we designed a paradigm based on computer mouse tracking in which both gaze  
403 shift and hand movement (moving the mouse) are necessary to switch attention between the  
404 options. Although mouse tracking and eye tracking are both commonly applied process tracking  
405 methods in decision-making research, their original purposes are slightly different: While eye  
406 tracking mostly target on attention and information searching strategies, mouse cursor tracking  
407 data reflect more about indecision and momentary preference [28]. In our paradigm however,  
408 subjects must move the cursor closer to get a better view of each stimulus, as if approaching a  
409 real object to have a better look. In this way, the mouse trajectory can reflect attention during  
410 sampling as eye traces did in previous studies. Moreover, our paradigm can be applied to study  
411 eye-hand cooperation and coordination during decision-making as well.

412           Traditionally, sequential sampling models assume that during decision-making, subjects  
413 sample their options continuously until the relative evidence for one option reaches a  
414 predetermined threshold, and such models capture the speed-accuracy trade-off phenomenon  
415 well [19, 29, 30]. In our study, the decision time correlated to the difficulty of the decision,  
416 which is in accordance with previous theories. However, our results showed that subjects would  
417 make extra switches between the items and spend more time during which the accuracy of the  
418 decision has not been improved significantly. Specifically, these extra switches were biased to  
419 the choice eventually made. According to Krajbich [19], even as the decision variable evolves  
420 and one option emerges as the winning one, it is still optimal to continue sampling information  
421 randomly instead of favoring the leading option, since the information from both the winning  
422 and losing options are of equal importance. In contrast, other studies [10, 31, 32] as well as our

423 results reported a clear bias to examine the finally chosen option more during the later phase of  
424 sampling. Mullett and Stewart [31] suggested that such bias may be due to a relative instead of  
425 absolute stopping rule. In fact, allowing the current decision variable to feed back into the  
426 sampling patterns will push the decision variable further to the leading option and accelerate  
427 the decision process. Such acceleration will not necessarily reduce the accuracy of the decision,  
428 because it only happens at the later stage of sampling in which the main task is just to validate  
429 the decision. This validating phase may be longer for perceptual decisions, for people tend to  
430 respond with more caution in perceptual decisions than in preferential decisions, especially  
431 when the stimuli are ambiguous [33]. Meanwhile, how these sub-thresholds within the  
432 preliminary decision phase and the validating phase are determined remains to be discussed.

433 Finally, our study provided evidence for the bidirectional causal relationship between  
434 attention during sampling and decisions by a Bayesian Network analysis. Bayesian Networks  
435 have been customarily applied for probabilistic causal dependence assessment and inference in  
436 a wide range of areas [34], including life science researches [35, 36]. It is capable of depicting  
437 and predicting the conditional dependences between experimental variables through observed  
438 data, thus becomes a very helpful tool for psychological studies. In our practice, we listed all  
439 possible network structures, which correspond to different hypotheses on the causal relationship  
440 between the last sampled item, the decision variable and the chosen item, and compared the  
441 predicted conditional probability of choosing the last sampled item with behavioral data.  
442 Contradicting previous literature [19], our results imply that attention is not randomly switching  
443 between the options but drawn to the winning item during the later stage of the sampling. This  
444 may lead to some modification to the basic assumptions of the aDDM in the future.

445

## 446 **Methods**

## 447 **Participants**

448           A total of 24 subjects participated in the study (13 females, age 20 – 30); all of them  
449 were university students. Subjects wore glasses for eyesight correction if needed. In order to  
450 avoid interference of previous experimental modes upon later sampling patterns, we divided  
451 the subjects into 3 groups, each containing 8 subjects, and asked each group to perform under  
452 only one mode (Centered: 4 females, mean age 25.9; Right Biased: 5 females, mean age 26.1;  
453 One-Switch: 4 females, mean age 24.9). The research was approved by the institutional ethics  
454 committee of Eotvos Lorand University, Hungary. All subjects provided informed written  
455 consent, and none declared any history of neurological diseases.

456

## 457 **Paradigm and Stimuli**

458           The paradigm was based on a two-alternative perceptual decision-making task: There  
459 were two imaginary circles on the left and right side of the screen (diameter 3.5 cm, distance  
460 20 cm between the centers), each containing 100 dots. The dots were either black or white on a  
461 50% gray background, and the proportions of white dots were different between the two groups.  
462 Subjects must decide in which group there were more white dots than in the other. To trigger  
463 each trial, subjects should use the computer mouse to drag the cursor to a small square box  
464 located at a random position (uniformly drawn from the central 80% range between the  
465 boundaries of the two stimuli), and stay there for a short period of time (1000 – 1500 ms  
466 randomly). After the trial was triggered, the two dot stimuli and two choice buttons would  
467 appear on the screen (Fig 1).

468           In the paradigm, a number of randomly selected dots were set invisible in each frame,  
469 and the number was in proportion to the distance between the cursor and each dot stimulus (Fig  
470 1A). Subjects were told to avoid pausing the mouse cursor in the middle of the screen while

471 looking at the stimuli on the two sides. In the unlimited-switch sampling mode, subjects could  
472 check each stimulus for as many times as they thought necessary. In the one-switch sampling  
473 mode, each stimulus could be examined only one time: after the cursor approached close  
474 enough to the stimulus (minimum 90% visibility) and then left, this stimulus would be masked  
475 and could not be examined again in this trial. Subjects were instructed not to move their mouse  
476 to masked stimuli during the task. System mouse acceleration was canceled to ensure the cursor  
477 movement on the screen was approximately linearly mapped to the actual movement of the  
478 mouse. Subjects were told not to pick up the mouse from the surface of the desk amid each trial.

479 We asked the subjects to move the cursor to the button corresponding to their choice  
480 (left stimulus – left button, and vice versa) and click on it to complete the trial. The choice  
481 buttons were positioned below the dot stimuli (vertically 7 cm from the centers of the stimuli)  
482 so that the y-axis downward movement of the mouse cursor would mark the start of the action  
483 execution stage. We set two types of tasks: In the first type, the choice buttons were horizontally  
484 centered (Fig 1A); in the second type, the choice buttons were positioned below the right stimuli  
485 (Fig 1B). The distinction between the two choices was defined as the difference between the  
486 proportions of white dots in the two groups. In each trial, we randomly drew an average  
487 proportion  $A$  from 40% – 60%, and then drew separately a distinction proportion  $D$  from 0% –  
488 30%, so the proportion of white dots for the two groups would be  $A \pm 0.5D$ . We randomly  
489 assigned the two calculated proportions to the left and right group, making sure that in half of  
490 the total number of trials there were more white dots in the left.

491 The display screen had a width of 28.5 cm and a height of 18 cm, resolution 1280×800  
492 pixels, refresh rate 60 Hz. The screen was placed at a normal distance in front of the subjects  
493 when using computers (approximately 50 – 70 cm). We recorded the mouse trajectory from the  
494 moment the trial was triggered to when a button was clicked and the final decision in each trial

495 for later analysis. The stimuli and mouse tracking codes were programmed in MATLAB  
496 Psychtoolbox-3.

497

## 498 **Modeling**

499 We built an aDDM following the framework proposed by Krajbich et al. [16]. The  
500 relative value for each dot stimulus was set as:

$$501 \quad \begin{cases} r_{\text{left}} = kp_{\text{left}} \\ r_{\text{right}} = kp_{\text{right}} \end{cases} \quad (6)$$

502 Here  $p_{\text{left}}$  and  $p_{\text{right}}$  were the proportion of white dots in each stimulus. The range of  $p_{\text{left}}$  and  
503  $p_{\text{right}}$  in the experiment was 0.25 – 0.75; we set constant  $k = 4$  so the range of  $r_{\text{left}}$  and  $r_{\text{right}}$  was  
504 1 – 3. The decision variable ( $DV$ ) started from 0 in each stimulation, and the decision barriers  
505 were +1 for choosing the left stimulus and –1 for choosing the left stimulus. We used the  
506 multiplicative model [37]: the drift rates ( $v$ ) in the model were given as:

$$507 \quad \begin{cases} v = d(r_{\text{left}} - \theta r_{\text{right}}), \text{left attended} \\ v = d(\theta r_{\text{left}} - r_{\text{right}}), \text{right attended} \end{cases} \quad (7)$$

508 Here  $d$  was the value scaling parameter, and  $\theta$  was the multiplicative attentional discounting  
509 parameter. Let  $DV_t$  denote the value of the decision variable at time  $t$ . For every time step  $\Delta t$ ,  
510 we have:

$$511 \quad DV_{t+\Delta t} = DV_t + v\Delta t + \varepsilon_t \quad (8)$$

512  $\varepsilon_t$  was drawn from zero mean Gaussian distribution with standard deviation  $\sigma$ . We assume that  
513 the first sampling is to the left stimulus with a fixed probability, and its duration drawn from a  
514 fixed distribution. Each following sampling is made alternatively between left and right which

515 will continue until it reaches a max time limit drawn from a fixed distribution or the decision  
516 variable reaches one barrier. We then fitted the three parameters in the model ( $\theta$ ,  $d$  and  $\sigma$ ) to the  
517 overall accuracy and the number of switches made in each trial for human behavioral data. The  
518 best fitting set of parameters was  $\theta = 0.52$ ,  $d = 0.0097$  and  $\sigma = 0.018$ . The fitted decision time  
519 ( $T$ ) was calculated in the following way:

$$520 \quad T = kt + nt_0 \quad (9)$$

521 Here  $t$  denoted the decision time in the stimulation,  $k$  the time scaling factor,  $n$  the number of  
522 switches in the stimulation, and  $t_0$  the fixed time spent on switching between the stimuli.  $k$  and  
523  $t_0$  were fitted to the behavioral data.

524 For the one-switch mode, there are two possible models regarding the stop rule for the  
525 second and last sampling: the second sampling can stop either when the decision variable  
526 reaches one barrier or when its duration reaches the limit, or it can go on until one barrier is  
527 reached without max time limit. The latter version fitted the decision time for human subjects  
528 in the one-switch mode better, therefore we applied this assumption.

529 After the parameters for the aDDM were fitted, we ran the stimulation for 960 trials  
530 (sample size equal to 120 trials multiplied by 8 subjects) in both the unlimited- and one-switch  
531 sampling modes, and compared the output with human behavioral data.

532

## 533 **Acknowledgements**

534 We would like to express our sincere gratitude to Prof. László MÉRÓ's supervision as  
535 well as his support and encouragement. We are also grateful for the help on practical issues  
536 from the Faculty of Education and Psychology ELTE and the kind participation of all the  
537 subjects in the experiments.

538

## 539 **References**

- 540       1. Lepora NF, Pezzulo G. Embodied choice: how action influences perceptual decision  
541       making. *PLoS computational biology*. 2015 Apr 7;11(4):e1004110. doi:  
542       10.1371/journal.pcbi.1004110
- 543       2. Connors BL, Rende R. Embodied Decision-Making Style: Below and Beyond  
544       Cognition. *Frontiers in psychology*. 2018;9. doi: 10.3389/fpsyg.2018.01123
- 545       3. Filimon F, Philiastides MG, Nelson JD, Kloosterman NA, Heekeren HR. How  
546       embodied is perceptual decision making? Evidence for separate processing of  
547       perceptual and motor decisions. *Journal of Neuroscience*. 2013 Jan 30;33(5):2121-36.  
548       doi: 10.1523/JNEUROSCI.2334-12.2013
- 549       4. Aczel B, Szollosi A, Palfi B, Szaszi B, Kieslich PJ. Is action execution part of the  
550       decision-making process? An investigation of the embodied choice hypothesis.  
551       *Journal of Experimental Psychology Learning Memory and Cognition*.  
552       2018;44(6):918-926. doi: 10.1037/xlm0000484
- 553       5. Marcos E, Cos I, Girard B, Verschure PF. Motor cost influences perceptual decisions.  
554       *PLoS One*. 2015 Dec 16;10(12):e0144841. doi: 10.1371/journal.pone.0144841
- 555       6. Hagura N, Haggard P, Diedrichsen J. Perceptual decisions are biased by the cost to  
556       act. *Elife*. 2017 Feb 21;6:e18422. doi: 10.7554/eLife.18422
- 557       7. de Lange FP, Fritsche M. Perceptual decision-making: picking the low-hanging fruit?.  
558       *Trends in cognitive sciences*. 2017 May 1;21(5):306-7. doi: 10.1016/j.tics.2017.03.006
- 559       8. Burk D, Ingram JN, Franklin DW, Shadlen MN, Wolpert DM. Motor effort alters  
560       changes of mind in sensorimotor decision making. *PLoS One*. 2014 Mar  
561       20;9(3):e92681. doi: 10.1371/journal.pone.0092681



- 562       **9.** Harris CM, Wolpert DM. The main sequence of saccades optimizes speed-accuracy  
563       trade-off. *Biological cybernetics*. 2006 Jul 1;95(1):21-9. doi: 10.1007/s00422-006-  
564       0064-x
- 565       **10.** Shimojo S, Simion C, Shimojo E, Scheier C. Gaze bias both reflects and influences  
566       preference. *Nature neuroscience*. 2003 Dec;6(12):1317. doi: 10.1038/nn1150
- 567       **11.** Armel KC, Beaumel A, Rangel A. Biasing simple choices by manipulating relative  
568       visual attention. *Judgment and Decision making*. 2008;3(5):396-403.
- 569       **12.** Lim SL, O'Doherty JP, Rangel A. The decision value computations in the vmPFC and  
570       striatum use a relative value code that is guided by visual attention. *Journal of*  
571       *Neuroscience*. 2011 Sep 14;31(37):13214-23. doi: 10.1523/JNEUROSCI.1246-  
572       11.2011
- 573       **13.** Atalay AS, Bodur HO, Rasolofoarison D. Shining in the center: Central gaze cascade  
574       effect on product choice. *Journal of Consumer Research*. 2012 May 3;39(4):848-66.  
575       doi: 10.1086/665984
- 576       **14.** Bird GD, Lauwereyns J, Crawford MT. The role of eye movements in decision  
577       making and the prospect of exposure effects. *Vision Research*. 2012 May 1;60:16-21.  
578       doi: 10.1016/j.visres.2012.02.014
- 579       **15.** Kunar MA, Watson DG, Tsetsos K, Chater N. The influence of attention on value  
580       integration. *Attention, Perception, & Psychophysics*. 2017 Aug 1;79(6):1615-27. doi:  
581       10.3758/s13414-017-1340-7
- 582       **16.** Krajbich I, Armel C, Rangel A. Visual fixations and the computation and comparison  
583       of value in simple choice. *Nature neuroscience*. 2010 Oct;13(10):1292. doi:  
584       10.1038/nn.2635
- 585       **17.** Krajbich I, Rangel A. Multialternative drift-diffusion model predicts the relationship  
586       between visual fixations and choice in value-based decisions. *Proceedings of the*

- 587 National Academy of Sciences. 2011 Aug 16;108(33):13852-7. doi:  
588 10.1073/pnas.1101328108
- 589 **18.** Tavares G, Perona P, Rangel A. The attentional drift diffusion model of simple  
590 perceptual decision-making. *Frontiers in neuroscience*. 2017 Aug 24;11:468. doi:  
591 10.3389/fnins.2017.00468
- 592 **19.** Krajbich I. Accounting for attention in sequential sampling models of decision  
593 making. *Current opinion in psychology*. 2018 Oct 13. doi:  
594 10.1016/j.copsyc.2018.10.008
- 595 **20.** Gottlieb J. Understanding active sampling strategies: Empirical approaches and  
596 implications for attention and decision research. *Cortex*. 2018 May 1;102:150-60. doi:  
597 10.1016/j.cortex.2017.08.019
- 598 **21.** Ludwig CJ, Evens DR. Information foraging for perceptual decisions. *Journal of*  
599 *Experimental Psychology: Human Perception and Performance*. 2017 Feb;43(2):245.  
600 doi: 10.1037/xhp0000299
- 601 **22.** Cassey TC, Evens DR, Bogacz R, Marshall JA, Ludwig CJ. Adaptive sampling of  
602 information in perceptual decision-making. *PloS one*. 2013 Nov 27;8(11):e78993. doi:  
603 10.1371/journal.pone.0078993
- 604 **23.** Wispinski NJ, Gallivan JP, Chapman CS. Models, movements, and minds: bridging  
605 the gap between decision making and action. *Annals of the New York Academy of*  
606 *Sciences*. 2018 Oct 1. doi: 10.1111/nyas.13973
- 607 **24.** Hagura N, Diedrichsen J, Haggard P. Action cost biases the perceptual decision  
608 making, only when the cost is implicit. *Translational and Computational Motor*  
609 *Control*, 2013.

- 610       **25.** Shadmehr R, Huang HJ, Ahmed AA. A representation of effort in decision-making  
611           and motor control. *Current biology*. 2016 Jul 25;26(14):1929-34. doi:  
612           10.1016/j.cub.2016.05.065
- 613       **26.** Morel P, Ulbrich P, Gail A. What makes a reach movement effortful? Physical effort  
614           discounting supports common minimization principles in decision making and motor  
615           control. *PLoS biology*. 2017 Jun 6;15(6):e2001323. doi:  
616           10.1371/journal.pbio.2001323
- 617       **27.** Orquin JL, Loose SM. Attention and choice: A review on eye movements in decision  
618           making. *Acta psychologica*. 2013 Sep 1;144(1):190-206. doi:  
619           10.1016/j.actpsy.2013.06.003
- 620       **28.** Schulte-Mecklenbeck M, Johnson JG, Böckenholt U, Goldstein DG, Russo JE,  
621           Sullivan NJ, Willemsen MC. Process-tracing methods in decision making: On  
622           growing up in the 70s. *Current Directions in Psychological Science*. 2017  
623           Oct;26(5):442-50. doi: 10.1177/0963721417708229
- 624       **29.** Heitz RP. The speed-accuracy tradeoff: history, physiology, methodology, and  
625           behavior. *Frontiers in neuroscience*. 2014 Jun 11;8:150. doi:  
626           10.3389/fnins.2014.00150
- 627       **30.** Forstmann BU, Ratcliff R, Wagenmakers EJ. Sequential sampling models in cognitive  
628           neuroscience: Advantages, applications, and extensions. *Annual review of*  
629           *psychology*. 2016 Jan 4;67:641-66. doi: 10.1146/annurev-psych-122414-033645
- 630       **31.** Mullett TL, Stewart N. Implications of visual attention phenomena for models of  
631           preferential choice. *Decision*. 2016 Oct;3(4):231. doi: 10.1037/dec0000062
- 632       **32.** Onuma T, Penwannahkul Y, Fuchimoto J, Sakai N. The effect of order of dwells on the  
633           first dwell gaze bias for eventually chosen items. *PloS one*. 2017 Jul  
634           19;12(7):e0181641. doi: 10.1371/journal.pone.0181641

- 635       **33.** Dutilh G, Rieskamp J. Comparing perceptual and preferential decision making.  
636           Psychonomic bulletin & review. 2016 Jun 1;23(3):723-37. doi: 10.3758/s13423-015-  
637           0941-1
- 638       **34.** Heckerman D, Breese JS. Causal independence for probability assessment and  
639           inference using Bayesian networks. IEEE Transactions on Systems, Man, and  
640           Cybernetics-Part A: Systems and Humans. 1996 Nov;26(6):826-31. doi:  
641           10.1109/3468.541341
- 642       **35.** Friedman N. Inferring cellular networks using probabilistic graphical models. Science.  
643           2004 Feb 6;303(5659):799-805. doi: 10.1126/science.1094068
- 644       **36.** Yu J, Smith VA, Wang PP, Hartemink AJ, Jarvis ED. Advances to Bayesian network  
645           inference for generating causal networks from observational biological data.  
646           Bioinformatics. 2004 Jul 29;20(18):3594-603. doi: 10.1093/bioinformatics/bth448
- 647       **37.** Smith SM, Krajbich I. Gaze amplifies value in decision making. Psychological  
648           science. 2019 Jan;30(1):116-28. doi: 10.1177/0956797618810521

A

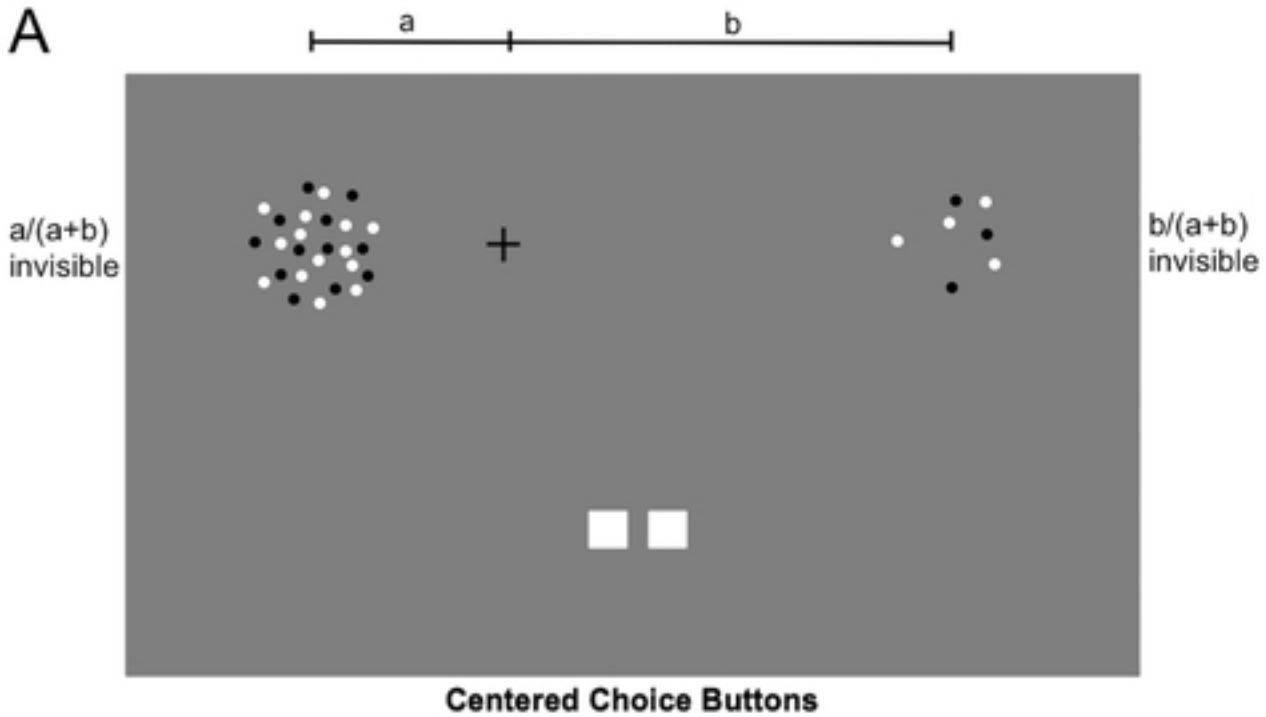

B

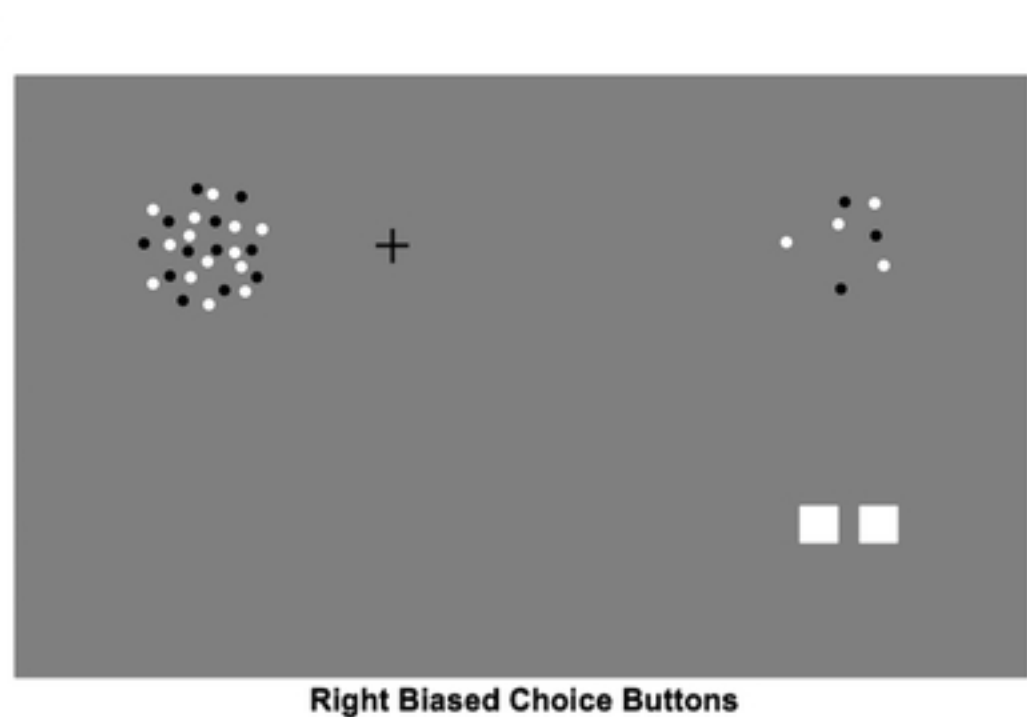

Figure

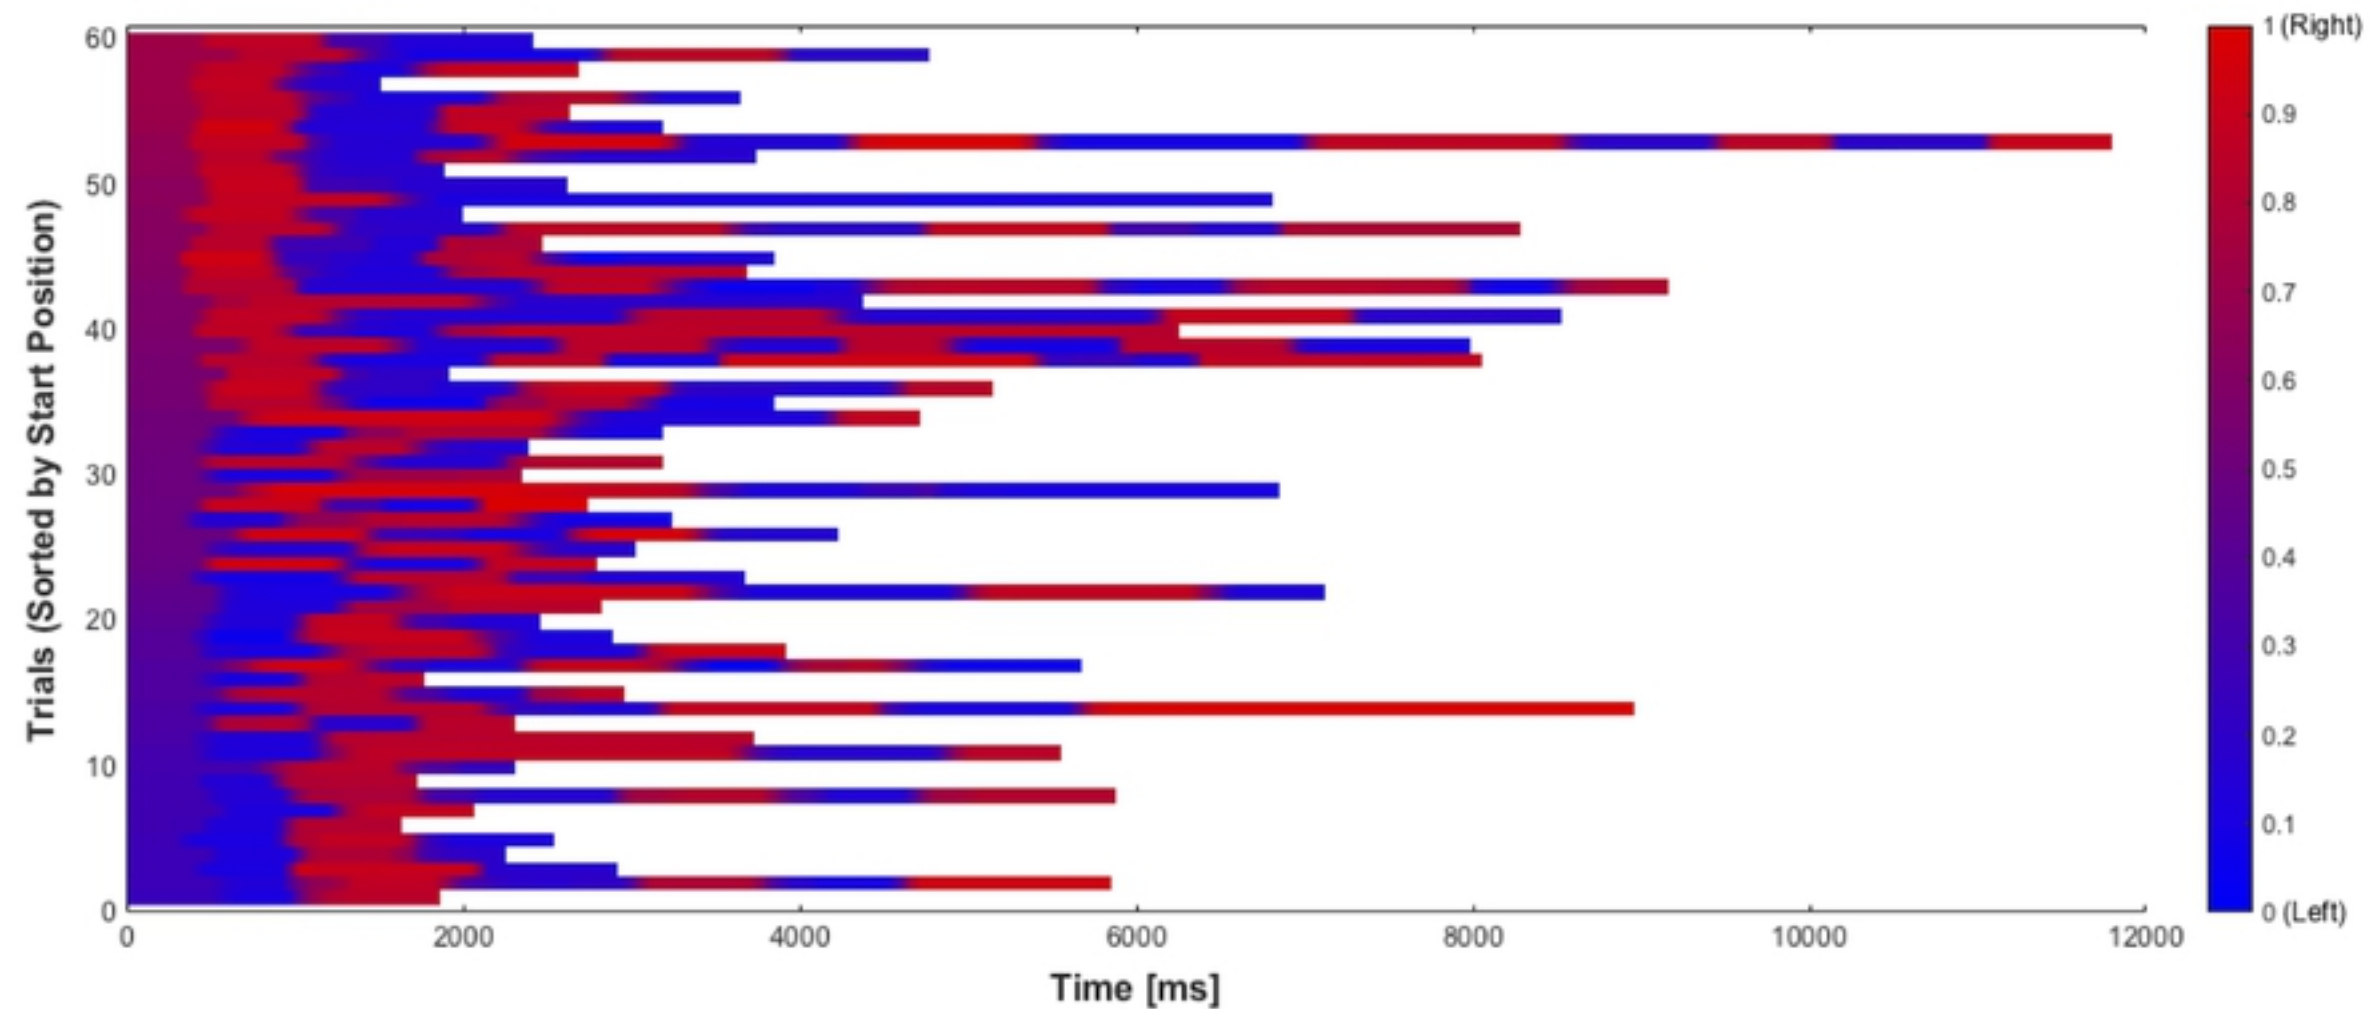

Figure

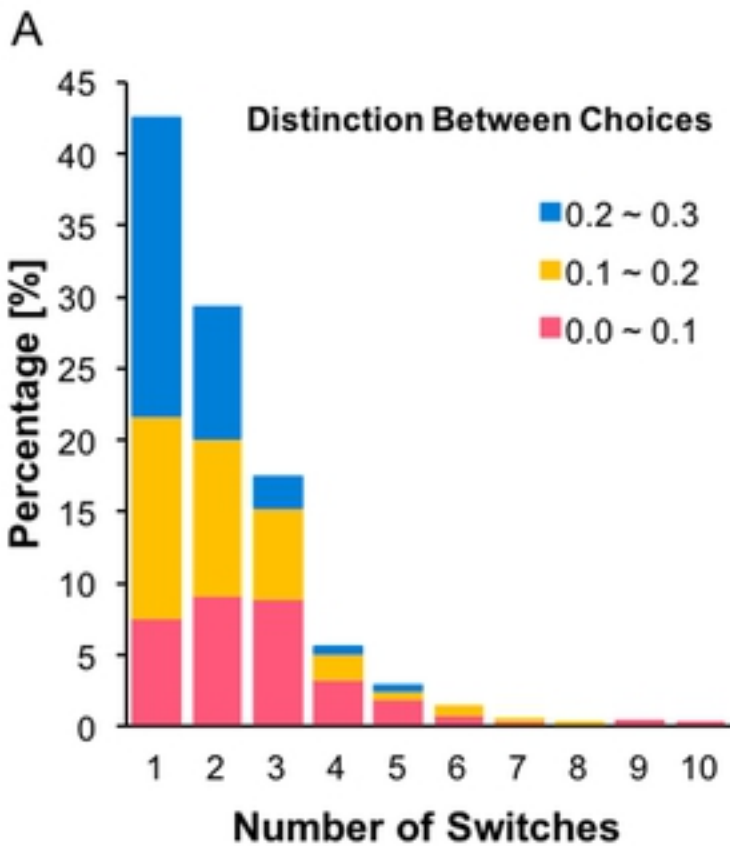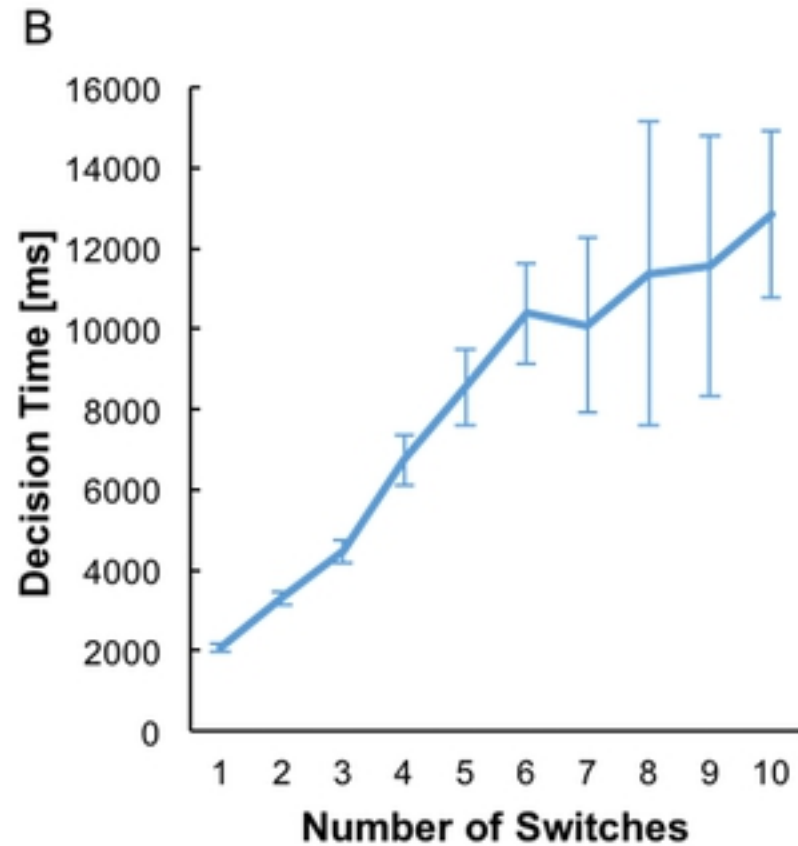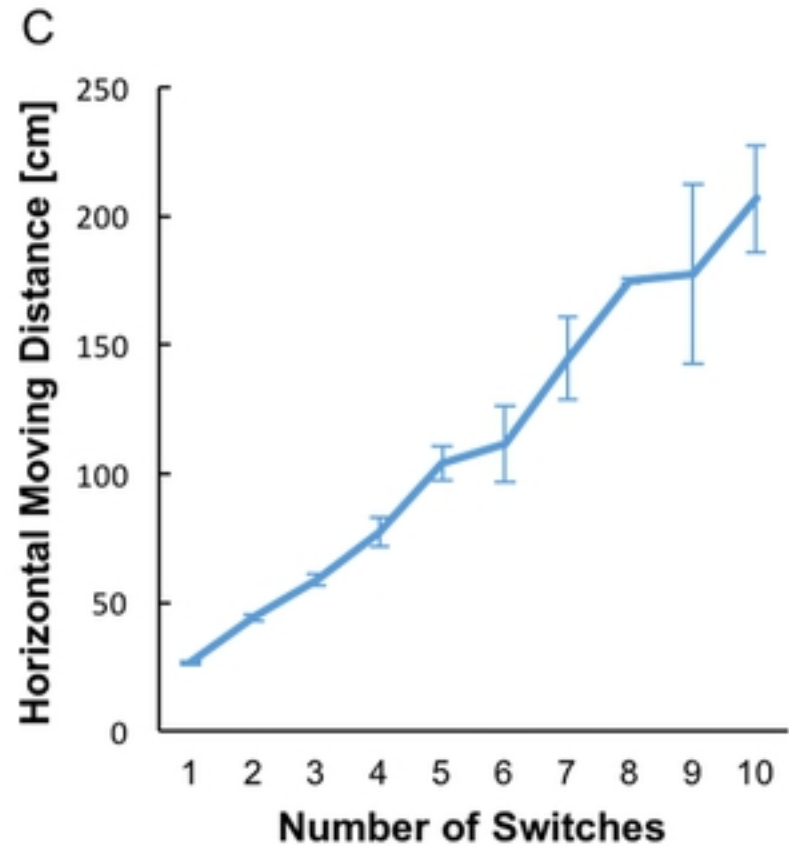

Figure

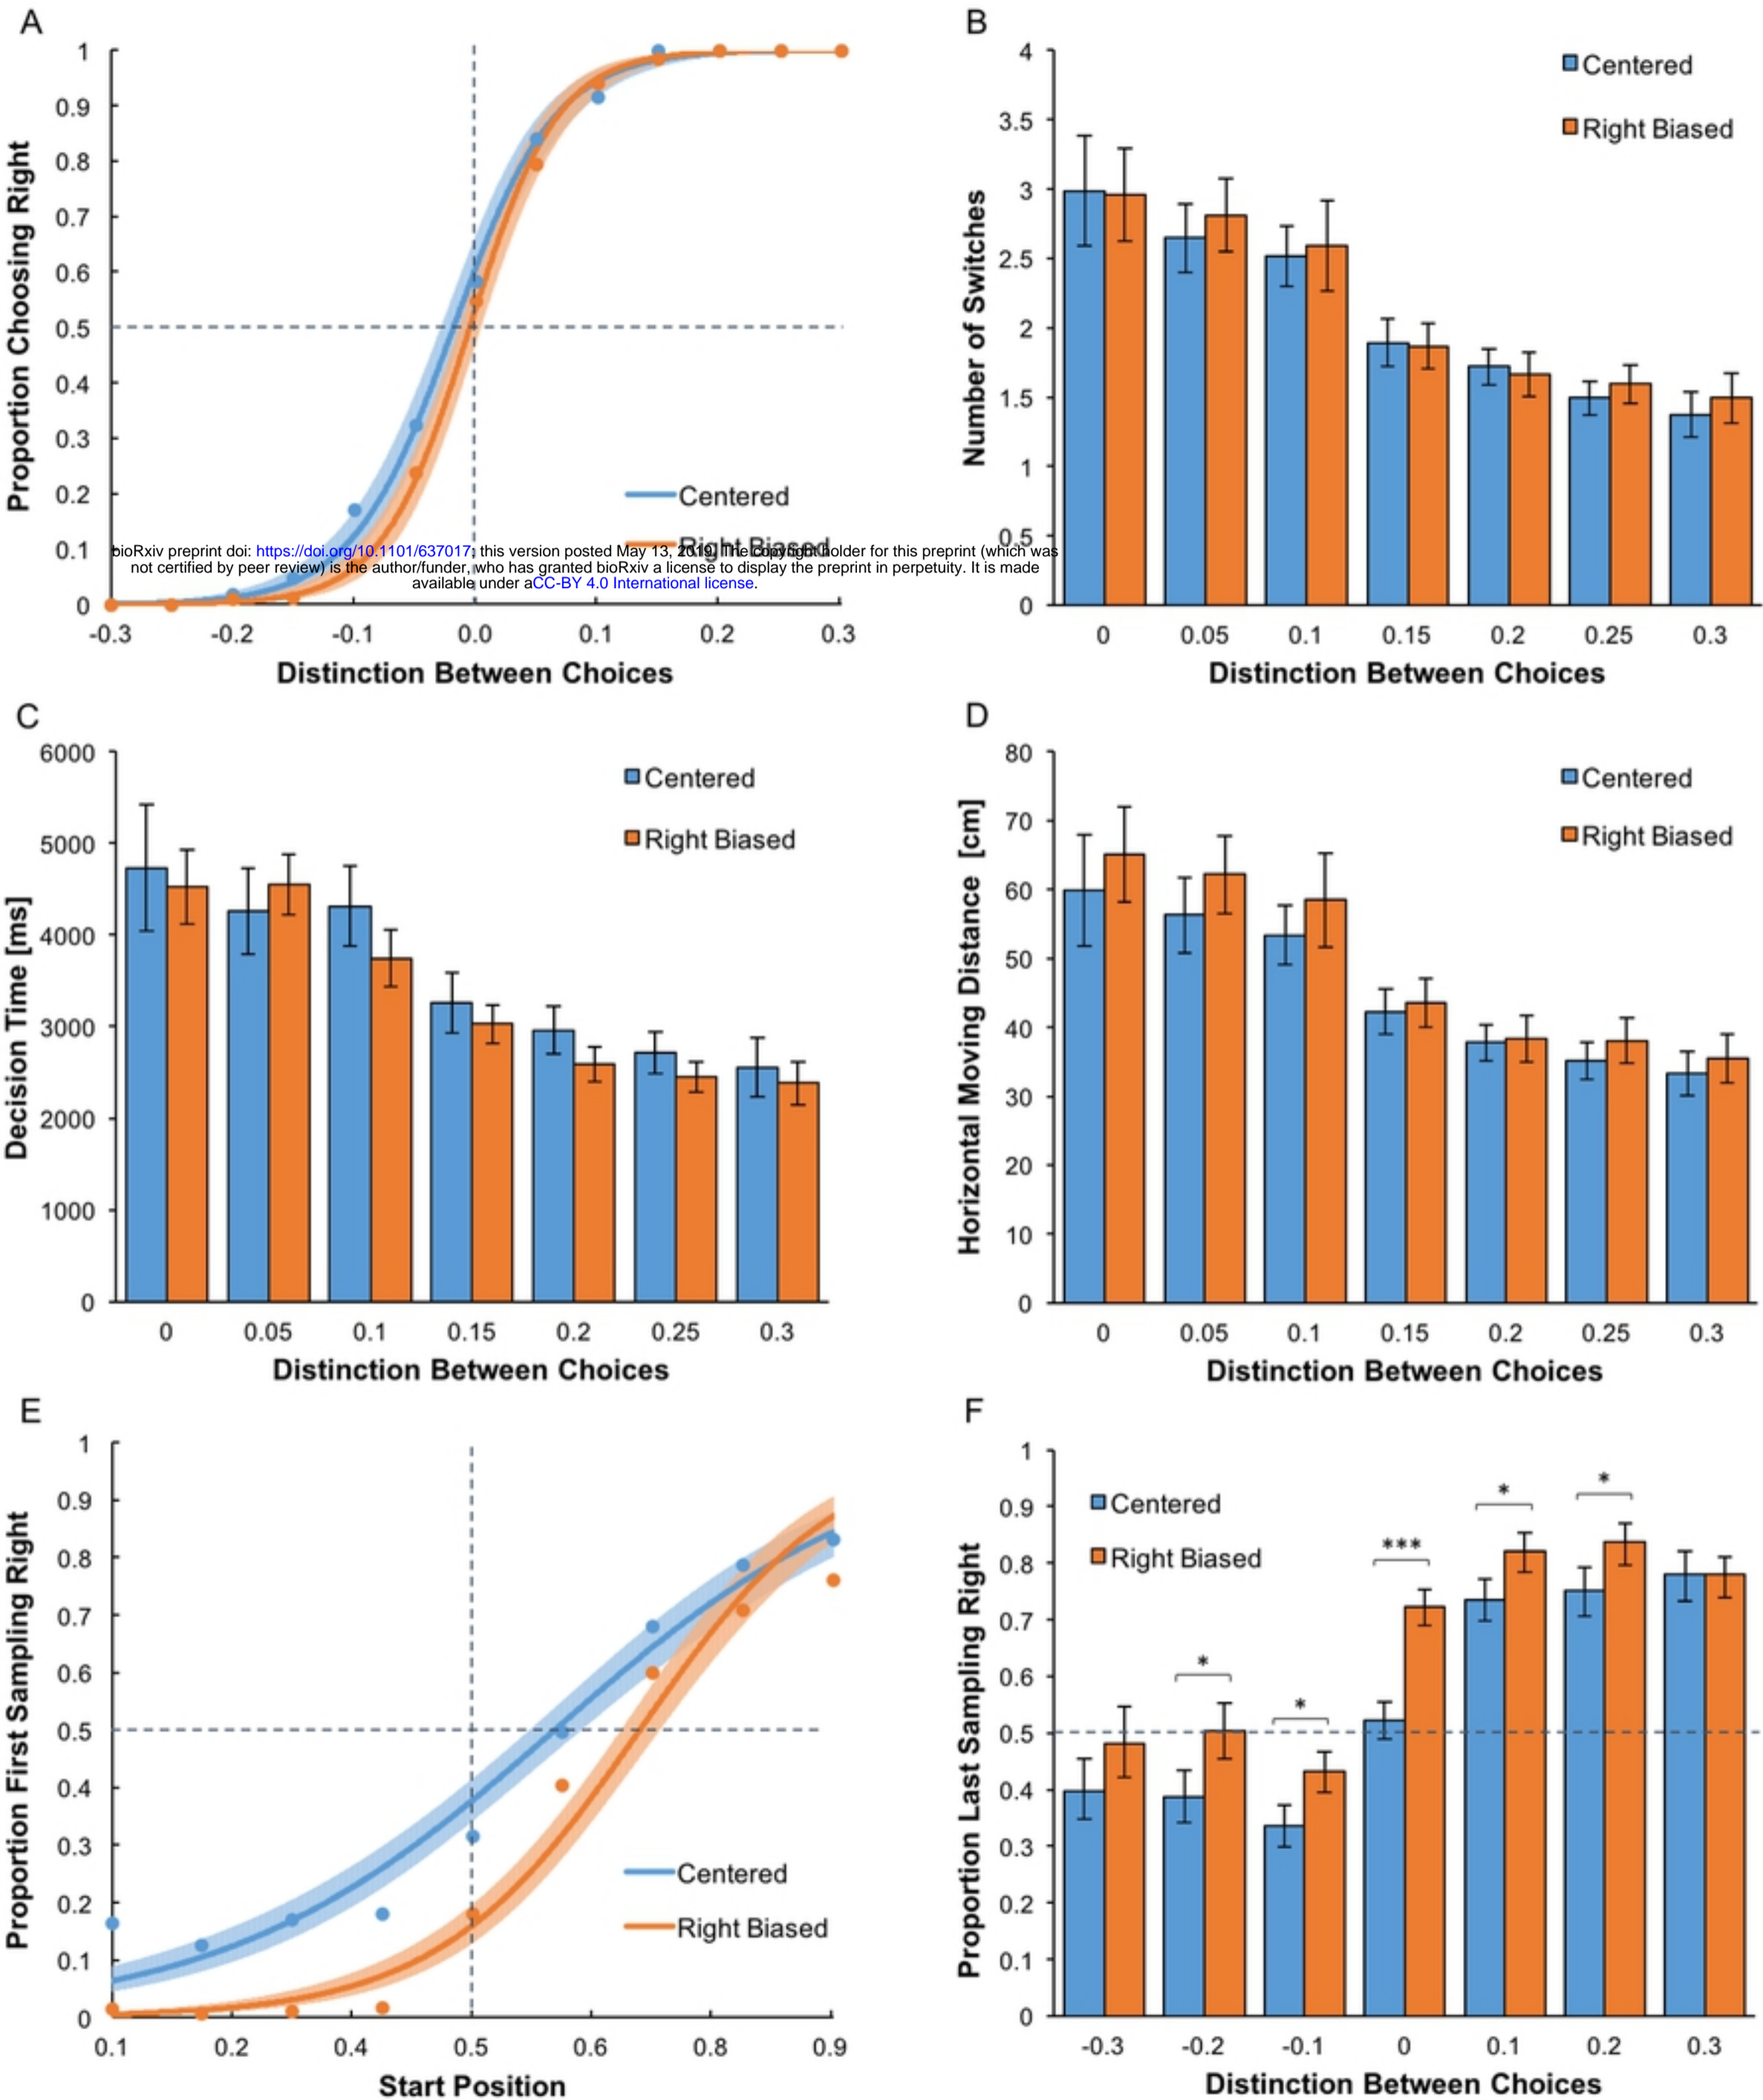



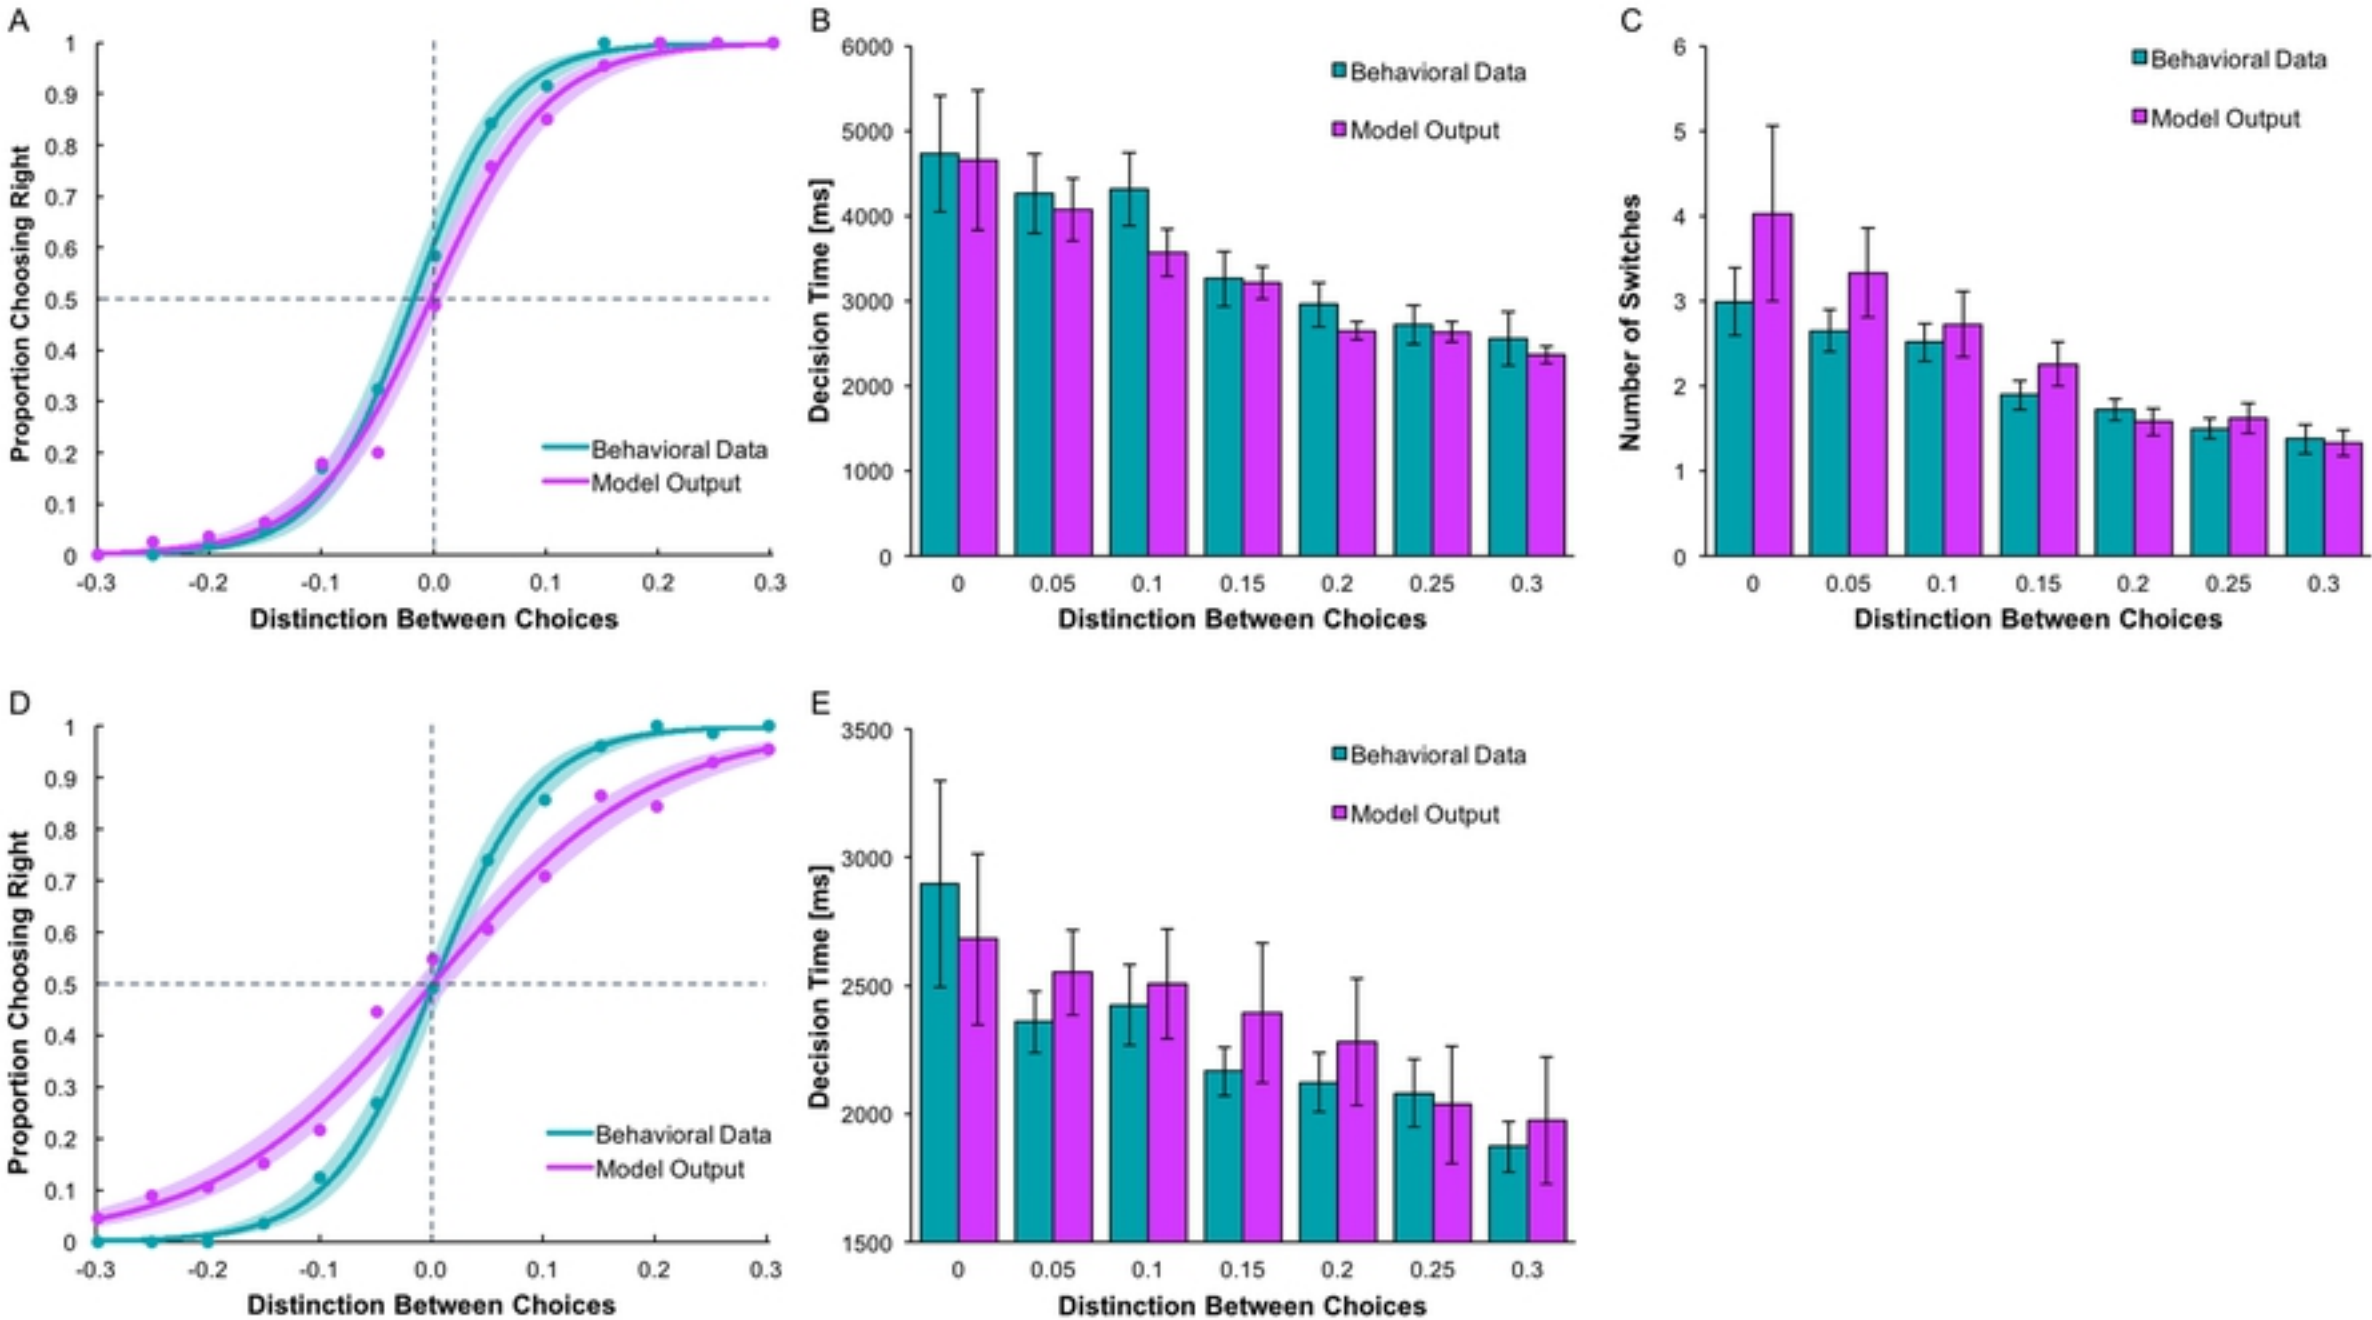

Figure

A

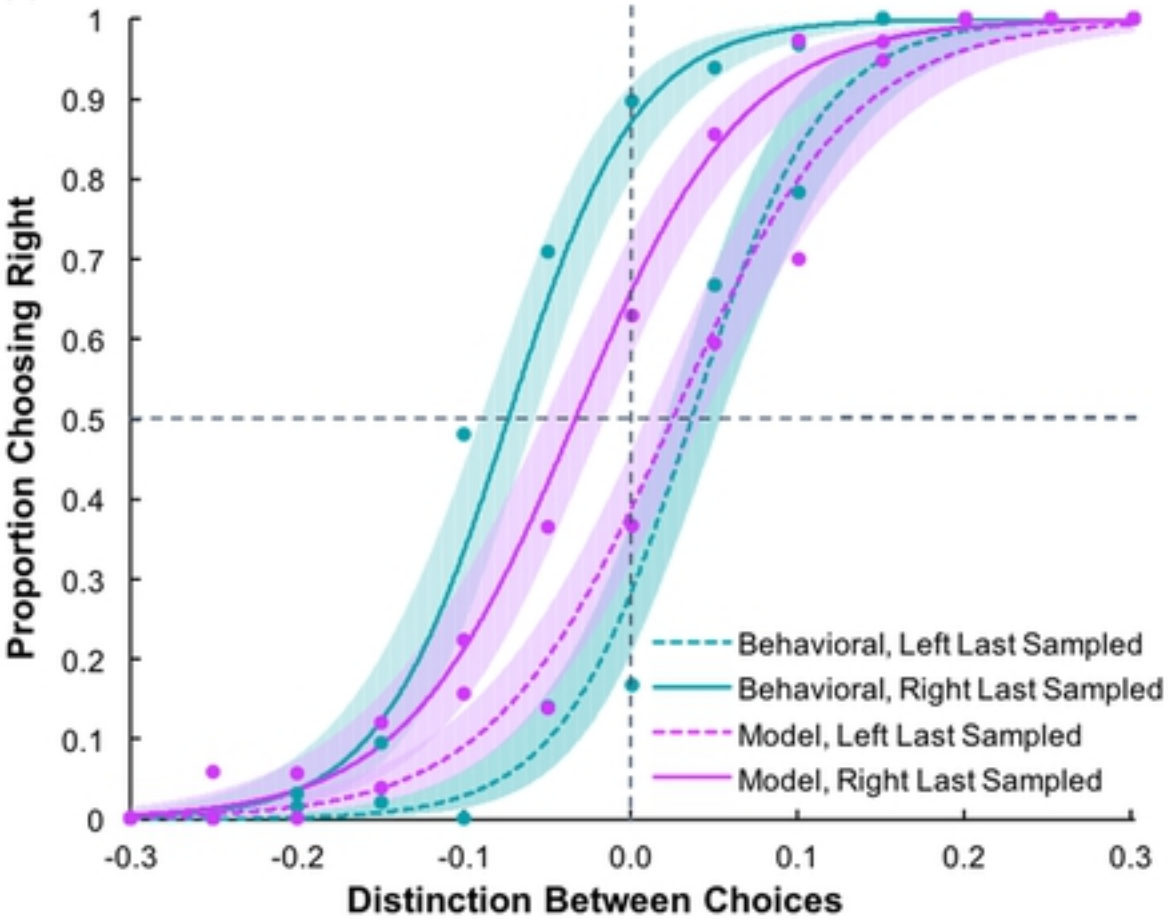

B

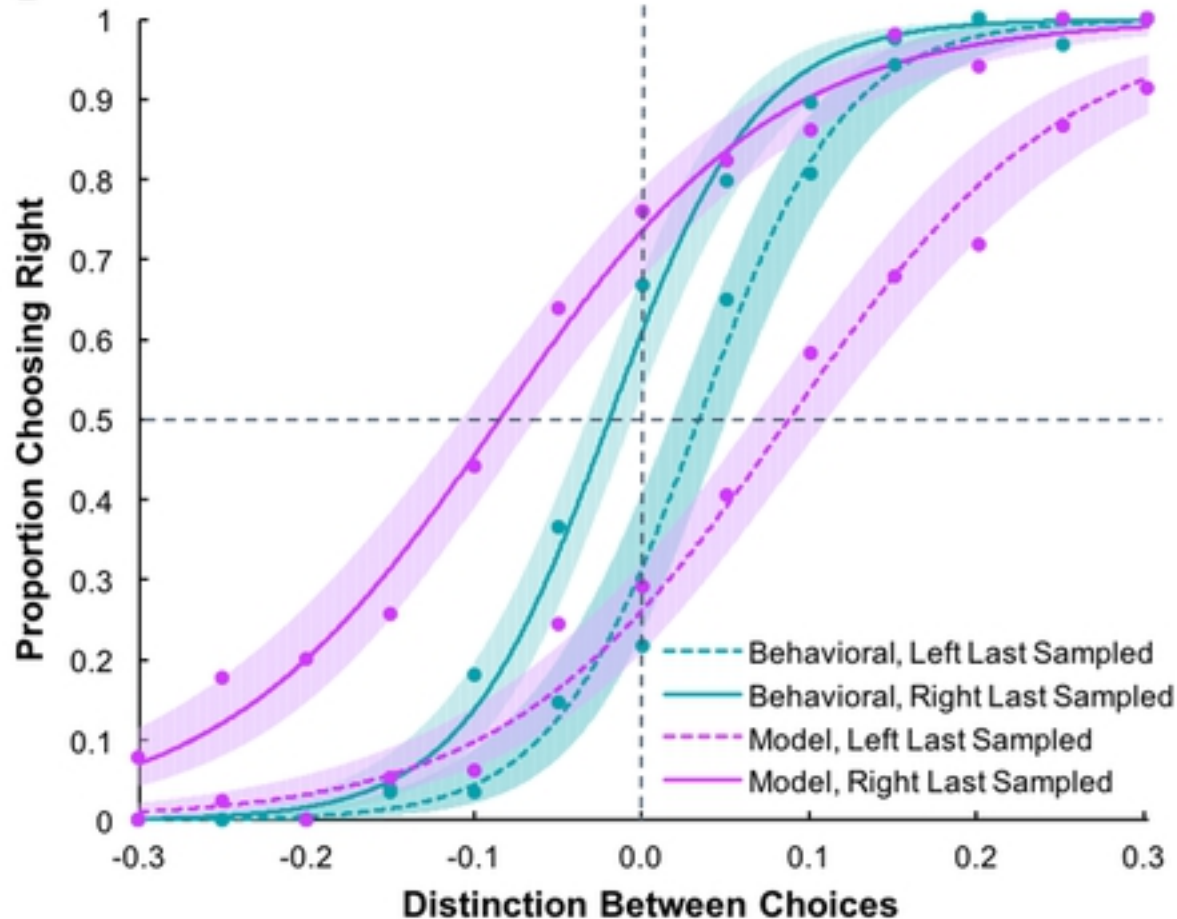

Figure

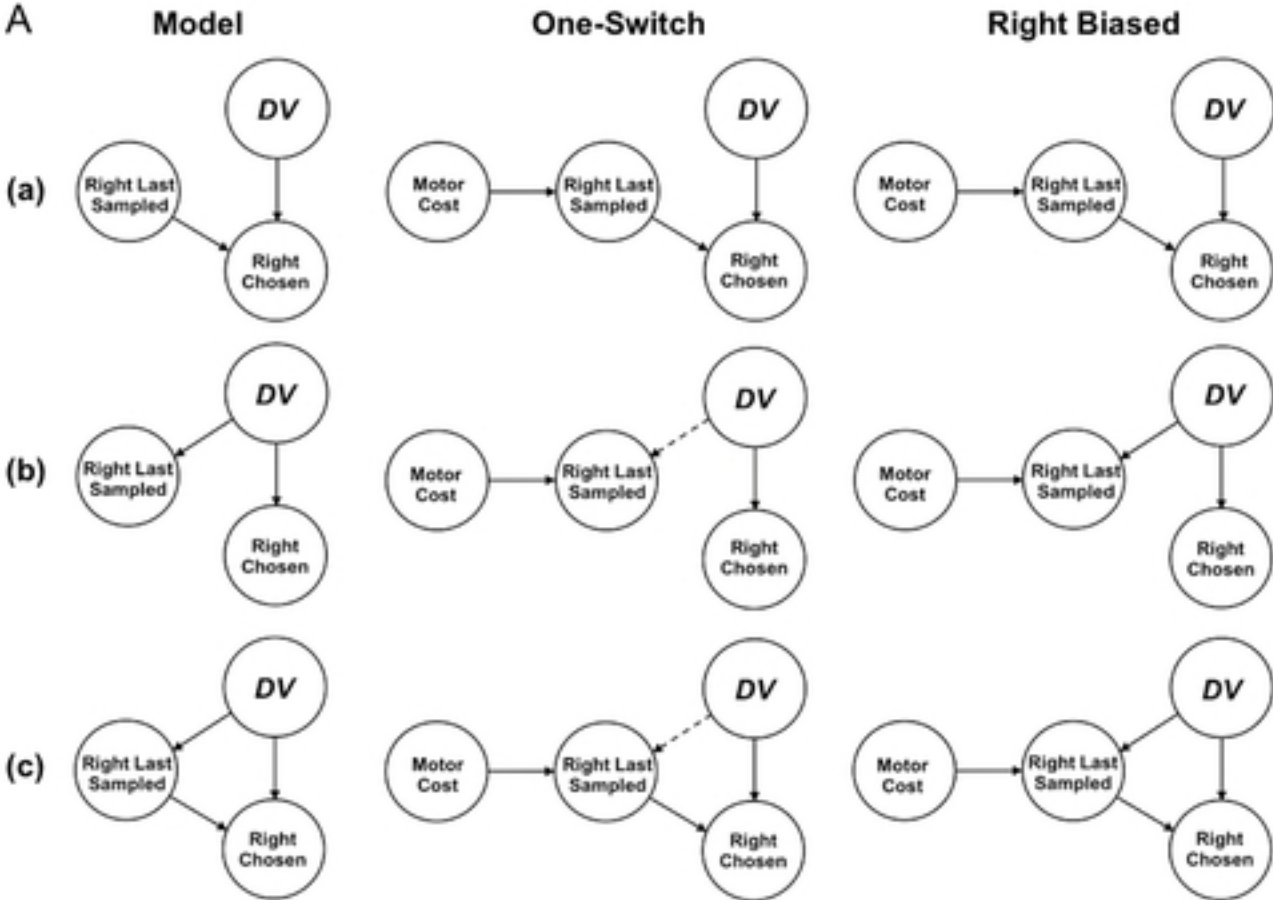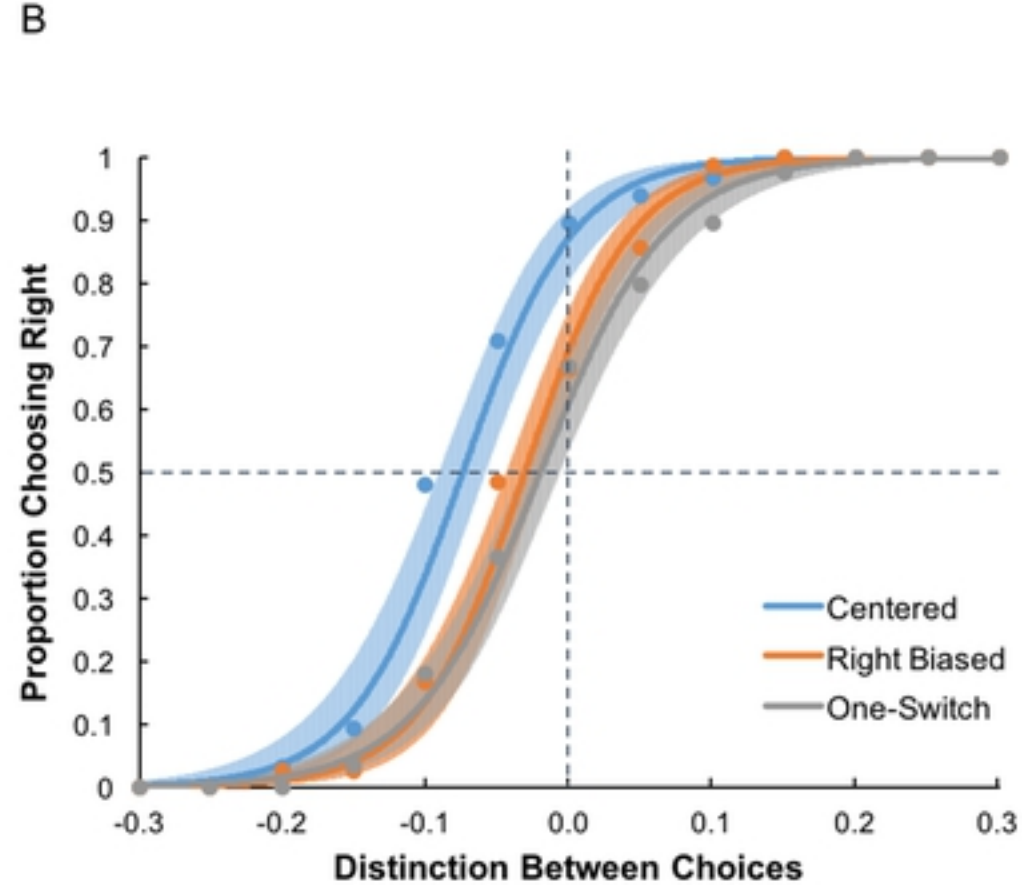

Figure

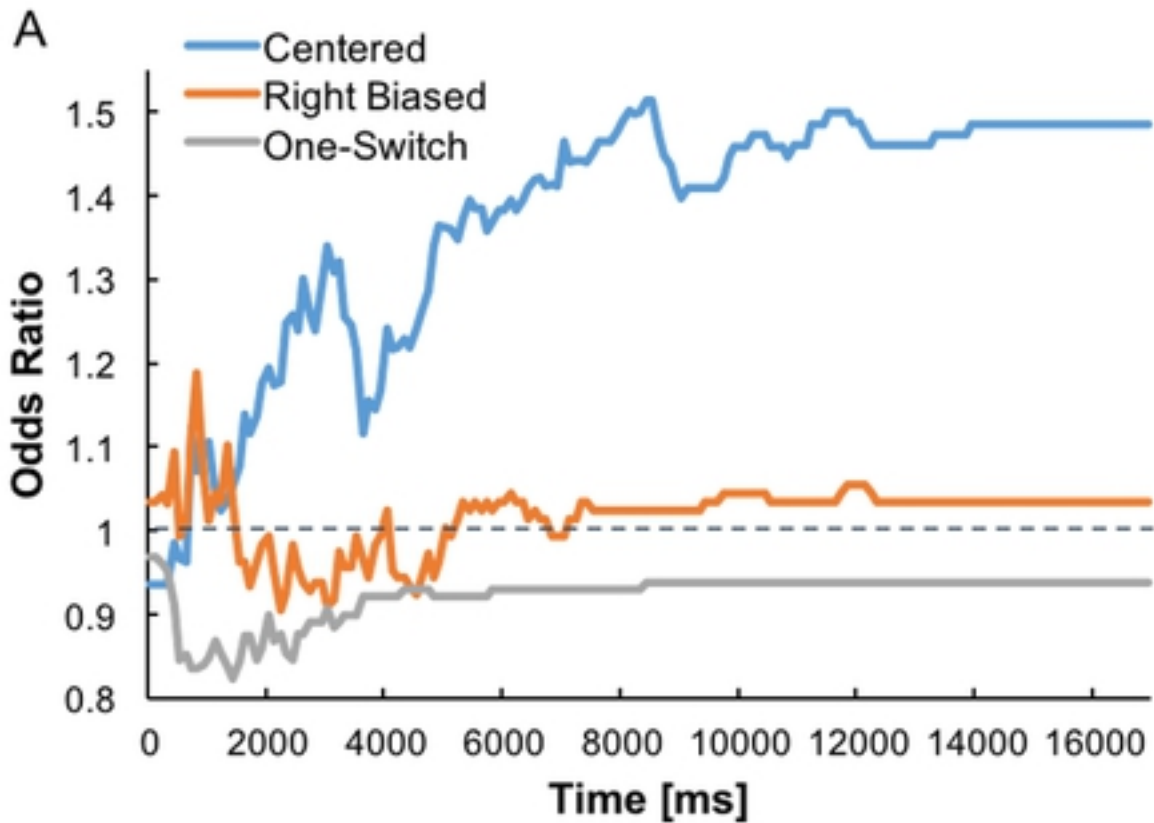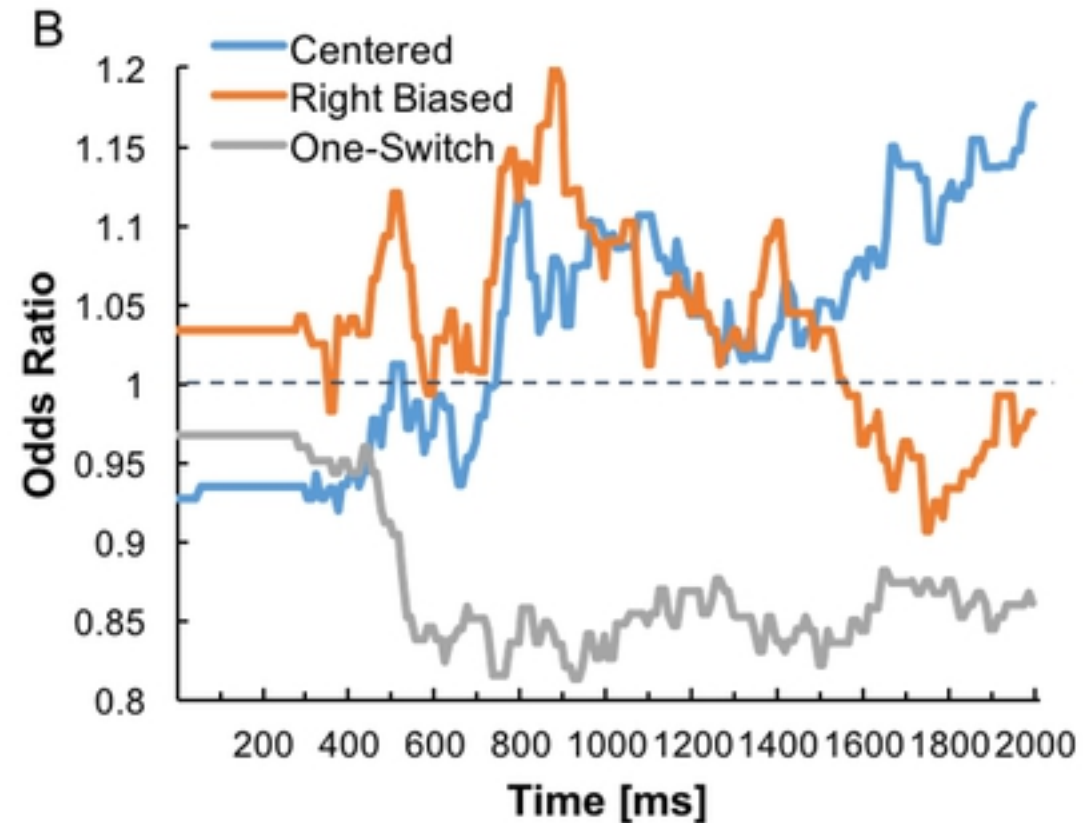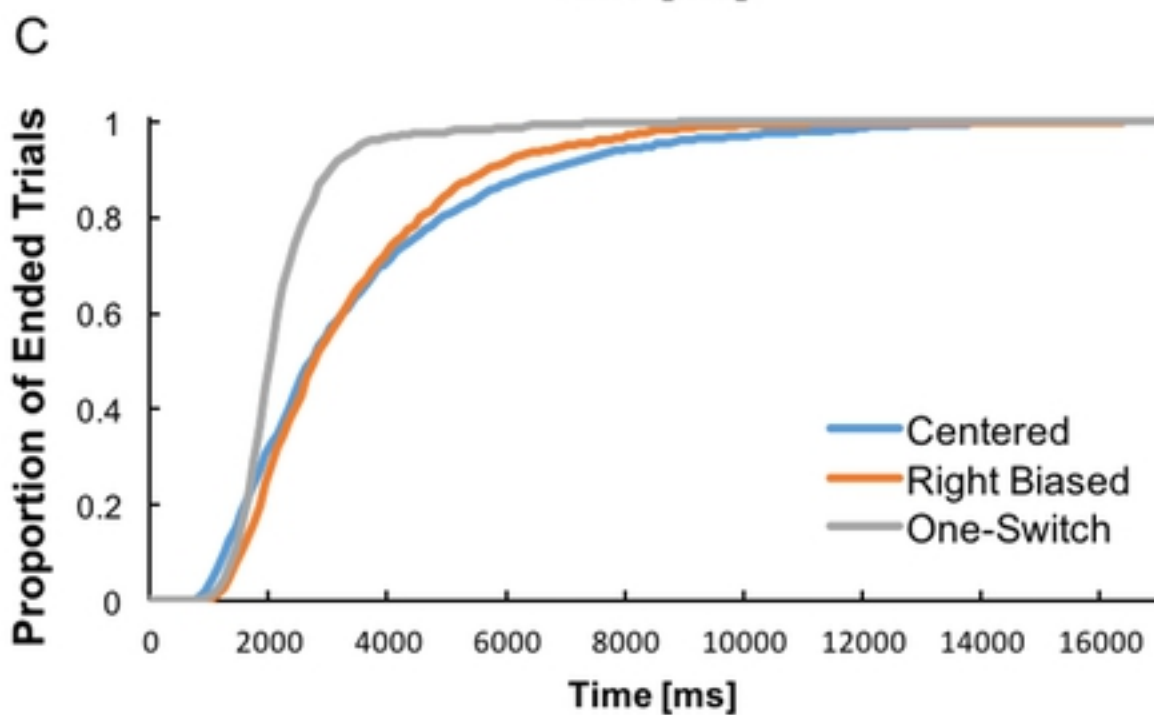

Figure

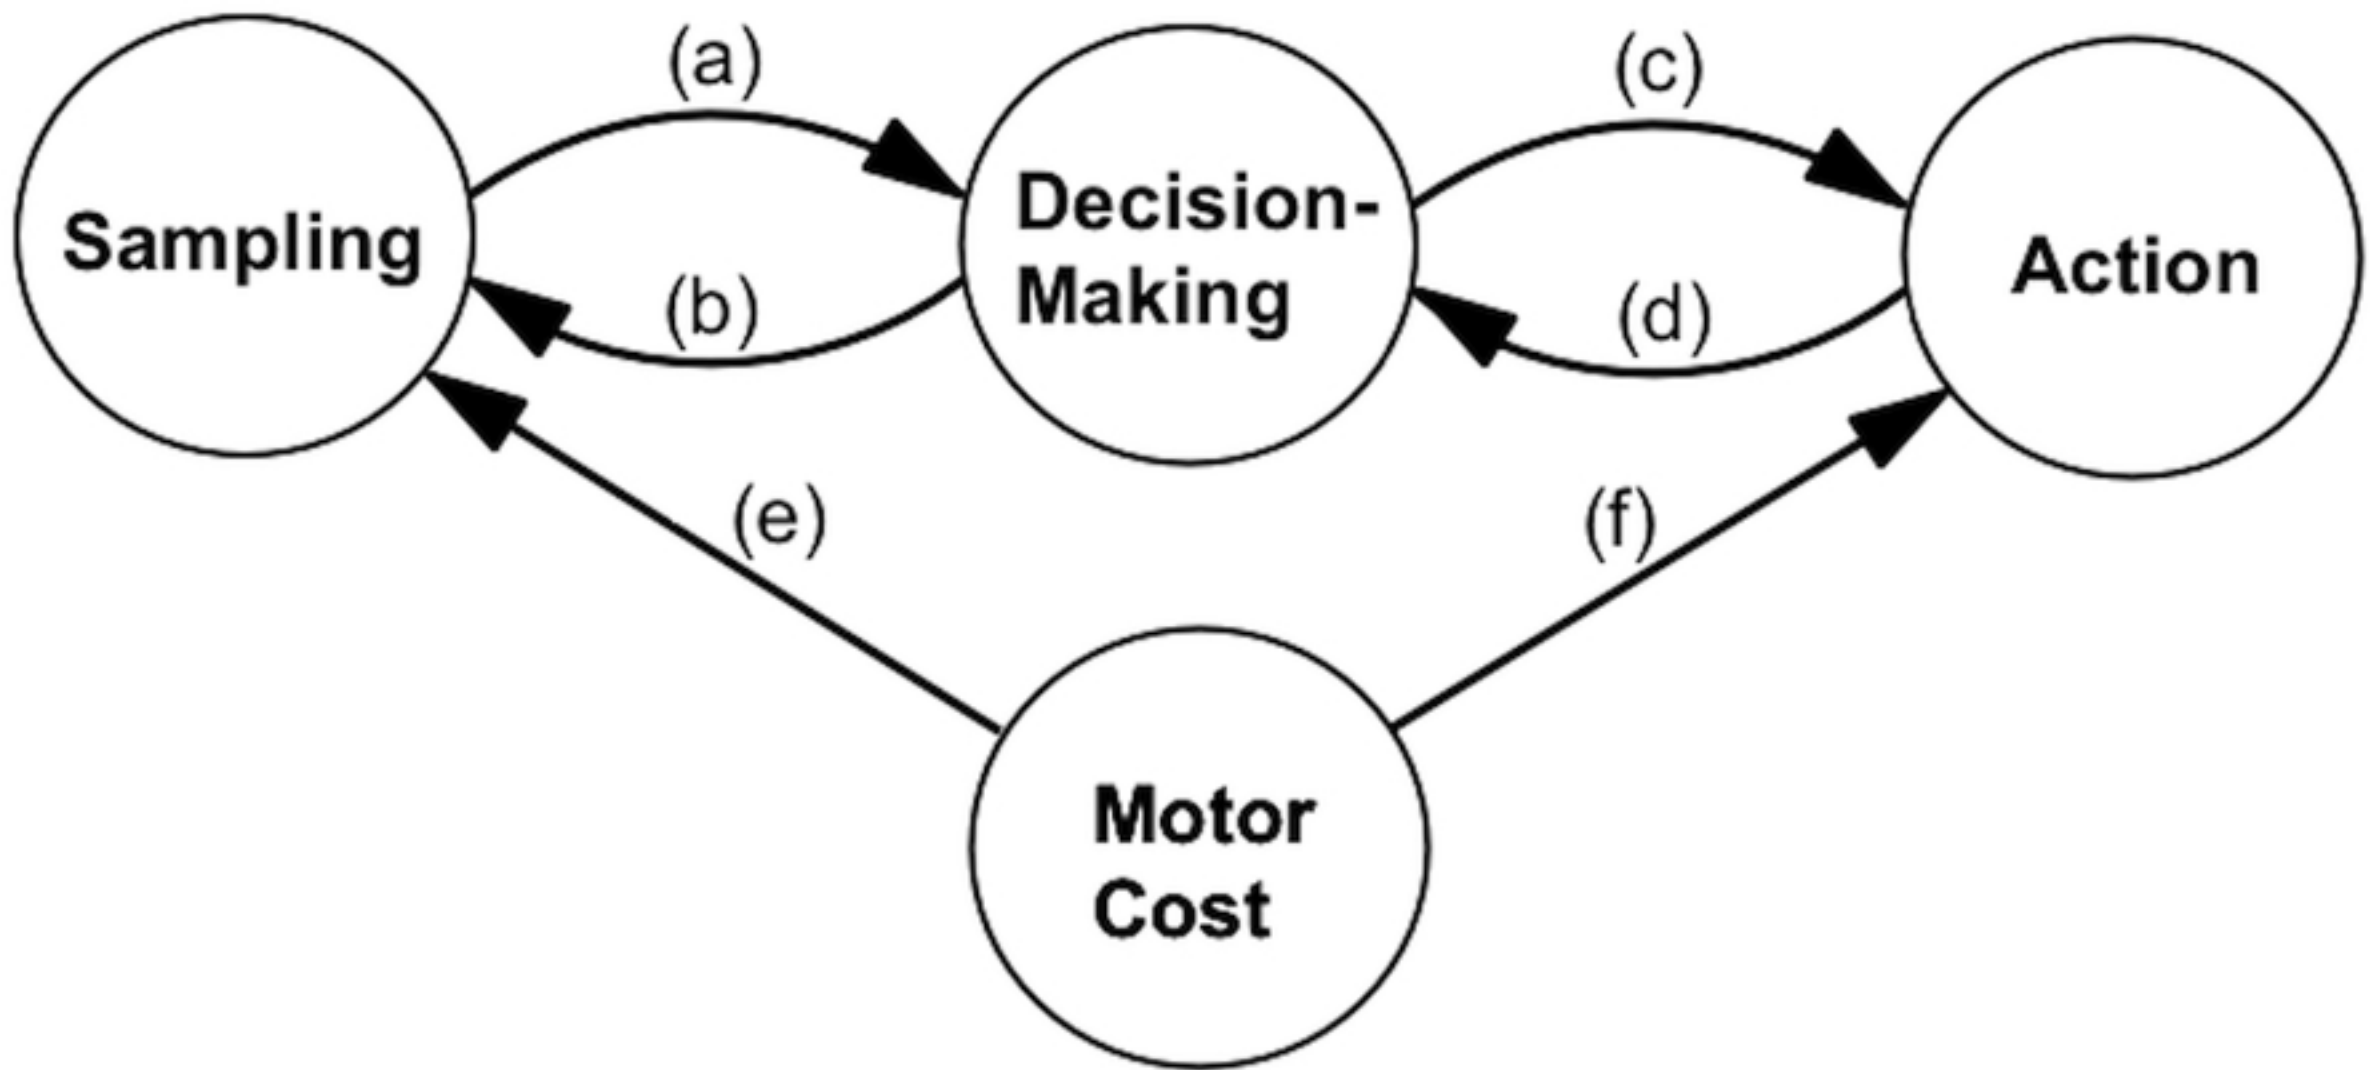

Figure
