1      **Motor effort and adaptive sampling in perceptual decision-making**

2

3

4

5      Tianyao Zhu<sup>1\*</sup>

6

7

8

9      <sup>1</sup>Faculty of Education and Psychology, Eötvös Loránd University, Budapest, Hungary

10

11

12

13      \* Corresponding author

14      E-mail: [tianyao.a.zhu@gmail.com](mailto:tianyao.a.zhu@gmail.com) (TZ)

15

## 16 **Abstract**

17           People usually switch their attention between the options when trying to make a  
18 decision. In our experiments, we bound motor effort to such switching behavior during a two-  
19 alternative perceptual decision-making task and recorded the sampling patterns by computer  
20 mouse cursor tracking. We found that the time and motor cost to make the decision positively  
21 correlated with the number of switches between the stimuli and increased with the difficulty  
22 of the task. Specifically, the first and last sampled items were chosen in an attempt to  
23 minimize the overall motor effort during the task and were manipulable by biasing the  
24 relevant motor cost. Moreover, we observed the last-sampling bias that the last sampled item  
25 was more likely to be chosen by the subjects. We listed all possible Bayesian Network models  
26 for different hypotheses regarding the causal relationship behind the last-sampling bias, and  
27 only the model assuming bidirectional dependency between attention and decision  
28 successfully predicted the empirical results. Meanwhile, denying that the current decision  
29 variable can feedback into the attention switching patterns during sampling, the conventional  
30 attentional drift-diffusion model (aDDM) was inadequate to explain the size of the last-  
31 sampling bias in our experimental conditions. We concluded that the sampling behavior  
32 during perceptual decision-making actively adapted to the motor effort in the specific task  
33 settings, as well as the temporary decision.

34

## 35 **Introduction**

36           When people try to choose between two similar products in a shopping center, they  
37 often approach each shelf where the products are displayed to have a closer look. If the choice  
38 is difficult to make, people may walk back-and-forth the two shelves for a long time. Many

39 people will start by examining the product around the entrance of the shop, but choose the one  
40 near the checkout counter eventually to save some effort. This daily example suggests that our  
41 decisions are not solely shaped by the relative values of the alternatives, but also other factors  
42 including the motor effort related to the sampling and the action execution processes.

43         However, sensorimotor aspects have not been integrated into decision-making studies  
44 until recently. It is still an on-going controversy whether action is part of decision-making:  
45 According to the Embodied Choice model, action execution is part of the decision-making  
46 process rather than merely a means to report the decision; in other words, action can feedback  
47 into the decision-making process [1]. Researchers have also studied decision-making by  
48 analyzing movement patterns [2] and sought neural imaging evidence for the involvement of  
49 the sensorimotor system during decision-making [3].

50         Meanwhile, Aczel et al. [4] argued that the observed decision bias was not caused by  
51 the movement toward one of the options, as the Embodied Choice model proposed, but rather  
52 the difference in the required motor effort during action. Other studies also reported the  
53 influence of motor effort during action upon decision-making: For example, perceptual  
54 decisions have been observed to be biased by the difference in the motor cost to make the  
55 response [5]. Moreover, the exposure to the unequal motor cost also biased the subsequent  
56 decisions even when they were vocally reported, indicating that motor effort can affect  
57 decision-making at a stage earlier than action execution [6]. De Lange and Fritsche [7]  
58 suggested that motor cost can influence decision-making similarly to rewards. Besides, motor  
59 effort can also affect changes of mind during decision-making [8].

60         Apart from action, the sampling behavior can be accompanied by motor effort as well,  
61 especially when the items to choose from are spatially separated. However, no investigation  
62 has focused on the influence of motor effort upon sampling. Although in some paradigms two  
63 or more visual stimuli were present, the main form of movement involved during sampling

64 was the saccadic eye movement; unlike limb movements, energy costs are not a significant  
65 consideration in the planning for saccades [9].

66 Another issue following the separation of the options in space is the attention  
67 allocation during sampling. Typically, the decision-maker switches the attention (by the  
68 behavior of switching the gaze) between the options at least once, sometimes multiple times.  
69 What is the relationship between attention and decision-making? Several results showed that  
70 manipulation of attention biased the decision [10-14]. Under the assumption that attention can  
71 influence value integration during decision-making, Krajbich et al. [15] proposed the  
72 attentional drift-diffusion model (aDDM). Unlike the traditional drift-diffusion model where  
73 the relevant evidence accumulates at a constant rate (the drift rate) within one decision, the  
74 aDDM allows the drift rate to change with attention: the option currently being attended  
75 (gazed at) shall receive more evidence. Such a model has successfully explained the gaze  
76 patterns and several gaze-related biases in preferential and perceptual decisions performed by  
77 human subjects [15-17].

78 Specifically, the aDDM assumes that attention or gaze switches between the options  
79 randomly. In fact, there is rare evidence supporting that temporary choices can influence  
80 attention allocation. Shimojo et al. [18] reported the gaze cascade effect that gaze was biased  
81 toward the finally chosen item during preferential decision-making, yet Krajbich [19] argued  
82 that the phenomenon was readily explained by the aDDM and suggested that gaze or attention  
83 has a causal effect on choice, but not vice versa.

84 Under natural circumstances, humans gather information and sample relevant cues  
85 with attention and active sensing behaviors (shift of gaze and assisting limb/body movement)  
86 [20]. Sampling behavior itself can be regarded as a low-level decision-making process about  
87 what information to acquire, as well as where and when [21]. In the current study, we aim to  
88 figure out the factors influencing sampling patterns during a basic perceptual decision-making

89 task, especially how sampling behavior adapts to the expected motor effort given the specific  
90 environment of the task. We designed a paradigm in which motor effort was bind to the  
91 sampling and action execution processes, and manipulated the expected motor cost to  
92 examine corresponding changes in the sampling patterns. Additionally, we tested the causal  
93 relationship between the temporary decision and the attention allocation strategy during  
94 sampling by analyzing a Bayesian Network model and simulating an aDDM.

95

## 96 **Methods**

### 97 **Paradigm and stimuli**

98 The paradigm was based on a two-alternative perceptual decision-making task in  
99 which subjects were asked to decide which of the two groups of black and white dots  
100 contained more white ones. Two imaginary circles (diameter 3.5 cm) were located  
101 horizontally apart on the upper half of the screen (20 cm between their centers), each  
102 containing 100 dots. The dots were either black or white on a 50% gray background. In each  
103 trial, we randomly set the proportions of white dots in each group with the following method:  
104 First, we separately drew an average proportion  $A$  from  $[0.4, 0.6]$  and a distinction proportion  
105  $D$  from  $[0, 0.3]$ . The proportions of white dots in the two groups would be  $A \pm 0.5D$ . Then, we  
106 randomly assigned the two calculated proportions to the left and right group, making sure that  
107 in 50% trials there were more white dots in the left group.

108 To bind motor effort to the sampling process, we applied an artificial rule that the  
109 sampling quality is in proportion to the distance between the agent and the stimulus. In natural  
110 circumstances, it is interpreted as ‘the closer one gets to look at an object, the more details  
111 will be seen’, and ‘getting closer’ needs motor effort. In our paradigm, the position and color

112 of each dot were fixed within the trial, but in each frame (frame rate 60 fps) a different set of  
113 randomly selected dots were made invisible so that the dots were ‘blinking’ with varying  
114 phase and rate. The number of invisible dots in each frame was in proportion to the current  
115 distance between the mouse cursor and each dot stimulus, thus the closer the cursor was to the  
116 stimulus, the more dots were visible in a certain period (Fig 1B). When the cursor was moved  
117 to the leftmost, the left group of dots would become completely visible and static, while the  
118 right group would be completely invisible. Therefore, to get better sampling quality, subjects  
119 must make some motor effort to move the cursor closer to the stimulus they want to examine.

120

121 **Fig 1. Illustration of the paradigm. (A)** A fixation (1000 – 1500 ms) on the start position  
122 with the mouse cursor was necessary to trigger each trial. After that, subjects moved the  
123 cursor to the stimuli alternatively to sample them. Finally, subjects clicked on the  
124 corresponding button to report which stimulus contained more white dots. **(B)** The number of  
125 invisible dots per frame was in proportion to the distance between the cursor and the stimulus.  
126 Subjects must move the cursor close to the stimulus to get better sampling quality.

127

128 At the beginning of each trial, a start position was randomly drawn within the central  
129 80% range between the boundaries of the two stimuli, marked by a small white square on the  
130 screen. Subjects should drag the computer mouse cursor onto the square and stay fixed for a  
131 short time (1000 – 1500 ms randomly) to trigger the trial. After the fixation period, the two  
132 stimuli would appear, and the subject could start to sample them. Subjects were told to avoid  
133 pausing the cursor in the middle of the screen while looking sideways at the stimuli. We set  
134 two sampling modes: In the one-switch mode, subjects should and could only make one  
135 switching movement between the stimuli, which means they had only one chance to sample  
136 each of the alternatives. When the cursor was moved close enough to the stimulus (visible

137 dots more than 90% per frame) and then left, that stimulus would be masked and could not be  
138 examined again in the current trial. Subjects were instructed not to move their mouse to an  
139 already masked stimulus. The length of time to examine each stimulus was not limited. In the  
140 unlimited sampling mode, subjects could make as many switches and check each stimulus for  
141 as many times as they needed.

142         The motor effort during the action stage took the form of moving the cursor to the  
143 corresponding choice button and clicking on it to report the final choice. The choice buttons  
144 were two small white squares displayed on the lower half of the screen, vertically 7 cm from  
145 the centers of the stimuli. We set two types of trials differentiated by the location of the  
146 choice buttons: In the first type, the buttons were horizontally centered, so the motor effort  
147 (measured by the moving distance) to drag the cursor from the two stimuli to the buttons was  
148 approximately the same. In the second type, the buttons were placed under the right stimulus,  
149 so that the required motor effort would be less if the subject sampled the right stimulus last  
150 and started from there to reach for the buttons.

151         The display screen size was  $28.5 \times 18$  cm, resolution  $1280 \times 800$  pixels, refresh rate  
152 60 Hz. The screen was placed 50 – 70 cm in front of the subjects. System mouse acceleration  
153 was disabled to make the cursor movement on the screen linearly map the actual movement of  
154 the mouse. Subjects were told not to pick up the mouse from the surface of the desk amid  
155 each trial. Mouse trajectory was recorded from the moment the trial was triggered to when a  
156 button was clicked (sampling rate 60 Hz). We also recorded the final decision in each trial.  
157 The stimuli and mouse tracking codes were programmed in MATLAB Psychtoolbox-3.

158

## 159 **Participants and procedure**

160 A total of 24 subjects participated in the study (13 females, age 20 – 30); all of them  
161 were university students. Subjects wore glasses for vision correction if needed. The research  
162 was approved by the institutional ethics committee of Eotvos Lorand University, Hungary.  
163 All subjects provided informed written consent, and none declared any history of neurological  
164 diseases.

165 To avoid previous experimental processes interfering with later sampling patterns, we  
166 divided the subjects into 3 groups, each containing 8 subjects, and each group of subjects only  
167 performed in a single experimental condition (Table 1). After 10 practice trials to get familiar  
168 with the paradigm, each subject performed 2 blocks of 60 trials. A short break (5 – 10  
169 minutes) took place between the blocks. The complete experiment took approximately 40 –  
170 60 minutes per subject.

171 **Table 1. Details of the experimental condition settings.**

| Condition    | Sampling Mode             | Choice Button Position          | Female Subjects | Mean Age |
|--------------|---------------------------|---------------------------------|-----------------|----------|
| Control      | <i>unlimited switches</i> | <i>horizontally centered</i>    | 4 / 8           | 25.9     |
| Right-Biased | <i>unlimited switches</i> | <i>under the right stimulus</i> | 5 / 8           | 26.1     |
| One-Switch   | <i>one switch only</i>    | <i>horizontally centered</i>    | 4 / 8           | 24.9     |

172

## 173 **Data analysis**

### 174 **Sampling patterns**

175 *Decision time* for a trial was defined as the elapsed time from the onset of the stimuli  
176 to when the final decision was made, excluding the time of action execution. The dividing  
177 line between the sampling stage and the action stage was the moment when a downward y-  
178 axis component of the cursor velocity exceeded the threshold.

179 *Horizontal moving distance* during sampling was defined as the total moving distance  
180 of the cursor on the screen along the x-axis within the sampling stage of a trial.



181 To test the linear relationship between the variables depicting sampling patterns, we  
182 performed linear mixed-effects regressions with random effects for subject-specific intercepts  
183 and slopes.

## 184 **Psychometric curves**

185 Psychometric curves were fitted to the data pooled across all subjects within each  
186 group or all simulation trials in the same condition using the generalized linear model (GLM)  
187 with the logit link function.

## 188 **Comparing lines and curves**

189 To compare two regression lines, we used a generalized ANCOVA allowing different  
190 slopes and intercepts:

$$191 \quad Y = \beta_0 + \beta_1 X + I(\beta_2 + \beta_3 X) \quad (1)$$

192 where  $\beta_0$ ,  $\beta_1$ ,  $\beta_2$  and  $\beta_3$  were free parameters,  $X$  was the predictor variable, and  $I$  was the  
193 indicator variable whose value was 0 for the reference group and 1 for the other group.

194 To compare two psychometric curves, we fitted the data to the following logistic  
195 function:

$$196 \quad Y = \frac{1}{1 + e^{-(\beta_0 + \beta_1 X + I(\beta_2 + \beta_3 X))}} \quad (2)$$

197 Then, we tested the null hypotheses  $\beta_2 = 0$  and  $\beta_3 = 0$  with the two-tailed one-sample t-test to  
198 compare the intercepts and slopes (steepness) of the two curves.

199

## 200 **Bayesian Network modeling**

201 We listed all three possible Bayesian Network models for different hypotheses  
202 regarding the causal relationship between the decision variable before the last sampling, the  
203 last sampled item and the final choice in the trial. The conditional probability of choosing the  
204 right item given that it is last sampled was calculated under each hypothesis and compared  
205 with the empirical results.

206 For mathematical details of the models, see S1 Supporting Information.

207 To calculate the conditional probability  $p(\text{right chosen} \mid \text{right last sampled})$  from the  
208 behavioral data, we first fitted a psychometric choice curve (probability of choosing the right  
209 item vs. difference between the proportions of white dots in the stimuli) to the trials in which  
210 the right item was sampled last for each subject individually, and then marginalized the  
211 difference between the stimuli. The mean  $p(\text{right chosen} \mid \text{right last sampled})$  across the  
212 subjects in each group was compared with the value 0.5 (the probability without bias) using  
213 the one-tailed one-sample t-test. The One-Switch group and the Right-Biased group were  
214 compared with the Control group using Dunnett's test after a one-way ANOVA.

215

## 216 **aDDM simulation**

217 We built our aDDM following Krajbich et al. [15]. We set the relative value ( $r_{\text{left}}$  and  
218  $r_{\text{right}}$ ) to the proportion of white dots in each stimulus. The range of  $r_{\text{left}}$  and  $r_{\text{right}}$  in the  
219 experiment was [0.25, 0.75]. The decision variable ( $DV$ ) started from 0 in each simulation  
220 trial, and the decision barriers were  $-1$  for the left stimulus and  $+1$  for the right stimulus. We  
221 applied the multiplicative model [22]. The drift rates ( $v$ ) in the model were defined as:

$$222 \begin{cases} v = d(r_{\text{left}} - \theta r_{\text{right}}), \text{left attended} \\ v = d(\theta r_{\text{left}} - r_{\text{right}}), \text{right attended} \end{cases} \quad (3)$$

223 where  $d$  was the value scaling parameter, and  $\theta$  was the multiplicative attentional discounting  
224 parameter. Specifically, during the first sampling, the unattended stimulus was assigned a  
225 mean value  $r_{\text{mean}} = 0.5$  instead of the real value because the subject had not sampled that  
226 stimulus yet. Let  $DV_t$  denote the value of the decision variable at time  $t$ . For every time step  
227  $\Delta t$ ,

$$228 \quad DV_{t+\Delta t} = DV_t + v\Delta t + \varepsilon_t \quad (4)$$

229 where  $\varepsilon_t$  was drawn from a zero-mean Gaussian distribution with standard deviation  $\sigma$ . We  
230 assumed that the first sampling falls on the left stimulus with a fixed probability (Control:  
231 0.59, One-Switch: 0.57, from empirical data), its duration drawn from a fixed gamma  
232 distribution. Each successive sampling epoch fell alternatively on the left and right stimulus  
233 and would continue until it reached a max time limit drawn from another fixed gamma  
234 distribution or until the decision variable reached one barrier. The parameters of the two  
235 gamma distributions were fitted with maximum likelihood estimation (MLE) to the empirical  
236 sampling time data in the Control condition. Time step  $\Delta t$  was set to 10 ms. For human  
237 subjects in the Control group, the max number of switches in a single trial was 10, so we  
238 discarded simulations with more than 10 switches.

239 We fitted the three parameters in the model ( $\theta$ ,  $d$  and  $\sigma$ ) to the empirical data pooled  
240 across all subjects: For each set of parameters, we ran a fixed number of valid simulations  
241 (240 for the coarse search and 960 for the finer search) and compared the results with  
242 behavioral data using the following error metric:

$$243 \quad Err = \left( \frac{y_a' - y_a}{y_a} \right)^2 + \left( \frac{y_n' - y_n}{y_n} \right)^2 \quad (5)$$

244 where  $y_a = 0.9042$  and  $y_n = 2.0698$  were the accuracy and the mean number of switches  
245 calculated from the 960 trials pooled across the 8 subjects in the Control group, while  $y_a'$  and

246  $y_n'$  were the accuracy and the mean number of switches across all simulations. We performed  
247 a grid search for the best fitting parameters: In the  $i$ -th iteration, we tested the parameter sets  
248 given by the cross product of  $\{\theta_{i1}, \theta_{i2}, \theta_{i3}\}$ ,  $\{d_{i1}, d_{i2}, d_{i3}\}$  and  $\{\sigma_{i1}, \sigma_{i2}, \sigma_{i3}\}$ . Let  $(\theta_i, d_i, \sigma_i)$   
249 denote the parameters that generated the smallest *Err* value, then in the  $(i+1)$ -th iteration we  
250 tested a finer grid given by the cross product of  $\{\theta_i - 0.5\Delta\theta_i, \theta_i, \theta_i + 0.5\Delta\theta_i\}$ ,  $\{d_i - 0.5\Delta d_i, d_i,$   
251  $d_i + 0.5\Delta d_i\}$  and  $\{\sigma_i - 0.5\Delta\sigma_i, \sigma_i, \sigma_i + 0.5\Delta\sigma_i\}$ , where  $\Delta\theta_i$ ,  $\Delta d_i$  and  $\Delta\sigma_i$  were the step sizes used  
252 in the  $i$ -th iteration. The initial values were  $\{0.1, 0.5, 0.9\}$  for  $\theta$ ,  $\{0.001, 0.005, 0.009\}$  for  $d$ ,  
253 and  $\{0.01, 0.05, 0.09\}$  for  $\sigma$  in the coarse search and  $\{0.6, 0.7, 0.8\}$  for  $\theta$ ,  $\{0.004, 0.005, 0.006\}$   
254 for  $d$ , and  $\{0.03, 0.04, 0.05\}$  for  $\sigma$  in the finer search. We stopped the iterations when the step  
255 sizes became smaller than 0.5% of the parameter values. The final fitting results were  $\theta =$   
256  $0.67$ ,  $d = 0.0051$  and  $\sigma = 0.038$ .

257 For the One-Switch condition, we used the same set of parameters ( $\theta$ ,  $d$  and  $\sigma$ ) in the  
258 Control condition, but only two sampling epochs were allowed. The second sampling would  
259 continue until the decision variable reached one barrier. We discarded the simulations in  
260 which the second sampling exceeded 3000 ms, which was the max duration of the second  
261 sampling for 99.5% empirical trials in the One-Switch condition. The decision time for the  
262 simulations was calculated by adding the mean transition time (delay between the sampling  
263 epochs) measured from behavioral data to the total time length of the sampling epochs in the  
264 simulations.

265 We simulated the model for 960 valid trials (the same sample size as the empirical  
266 data pooled across all subjects in each condition) using the best fitting parameters above for  
267 the Control condition and the One-Switch condition separately and compared the results with  
268 human behavioral data.

269

## 270 **Results**

### 271 **General sampling patterns**

272           Firstly, we studied the general sampling patterns in the Control condition. We plotted  
273 the horizontal mouse cursor position recorded during the sampling stage against elapsed time  
274 in each trial. Fig 2 shows the time series of the cursor position from a single block performed  
275 by one subject: The 60 trials in the block were sorted by the start position. The horizontal  
276 positions between the two stimuli were linearly mapped to [0, 1] and shown in a red-blue  
277 color scale. The typical sampling pattern was to switch the cursor once or multiple times  
278 between the two stimuli. The cursor paused mostly at either the leftmost or the rightmost,  
279 meaning that only one of the stimulus was clearly visible at a time. Therefore, we can assume  
280 that the eye gaze and the attention of the subject switched between the stimuli together with  
281 the cursor, which enables the comparison between our paradigm and former sequential  
282 sampling tasks and models.

283

284 **Fig 2. Typical time series of the horizontal mouse cursor position during sampling.** Data  
285 were from a single block (60 trials) performed by one subject in the Control group and sorted  
286 by the start position in each trial. Red color indicates that the current cursor position is closer  
287 to the right stimulus, while blue indicates that the cursor is closer to the left.

288

289           If a subject made  $n$  switches in a trial, there would be  $n+1$  sampling epochs  
290 alternatively assigned to the two stimuli. Assuming that each sampling period has  
291 approximately the same duration, the decision time should linearly correlate with the number  
292 of switches in each trial. Moreover, most of the motor effort during sampling was spent on

293 switching the cursor from one stimulus to the other, the distance between them fixed.  
294 Therefore, the total motor effort within a trial (measured by the horizontal moving distance of  
295 the cursor) should also linearly correlate with the number of switches. Fig 3A shows the  
296 histogram of the number of switches made in all 960 trials performed by subjects in the  
297 Control group: In 42.5% trials only one switch was made, and the percentage of the trials  
298 decreased as the switches made in them increased. Fig 3B and 3C show that the decision time  
299 (linear mixed-effects regression:  $slope = 1276.6$  ms,  $P = 2.8 \times 10^{-21}$ ; Pearson's  $r = 0.78$ ) and  
300 the horizontal moving distance (linear mixed-effects regression:  $slope = 17.8$  cm,  $P = 2.6 \times 10^{-54}$ ;  
301 Pearson's  $r = 0.90$ ) linearly correlated with the number of switches.

302

303 **Fig 3. Number of switches within each trial, and its correlation with decision time and**  
304 **horizontal moving distance. (A)** Histogram of the number of switches. **(B)** Linear  
305 correlation between decision time and number of switches during the trials. Mixed-effects  
306 regression:  $slope = 1276.6$  ms,  $P = 2.8 \times 10^{-21}$ ; Pearson's  $r = 0.78$ . **(C)** Linear correlation  
307 between horizontal moving distance and number of switches during the trials. Mixed-effects  
308 regression:  $slope = 17.8$  cm,  $P = 2.6 \times 10^{-54}$ ; Pearson's  $r = 0.90$ . Data included 960 trials  
309 pooled across 8 subjects in the Control group.

310

### 311 **Influences of motor effort on sampling patterns**

312 The total motor effort within one single trial consisted of three parts: first, to drag the  
313 cursor from the start position to the first sampled item; second, to switch between the items  
314 one or more times during sampling (each switch took approximately the same moving  
315 distance, as discussed previously); third and lastly, to drag the cursor from the last sampled

316 item to the choice buttons. We studied how motor cost in the different parts interacted with  
317 the decision-making process (Fig 4):

318

319 **Fig 4. Right-Biased condition vs. Control condition.** (A) Psychometric choice curves. (B)  
320 Number of switches against trial difficulty, as measured by the absolute difference between  
321 the proportions of white dots in the stimuli. (C) Psychometric curves for the first sampled  
322 item. (D) Psychometric curves for the last sampled item. Error bars show 95% confidence  
323 intervals. Data included 960 trials pooled across 8 subjects in each condition.

324

325 Fig 4A shows the psychometric choice curves in the Control and the Right-Biased  
326 conditions: There was no statistically significant difference between the two curves (intercept:  
327  $P = 0.0958$ ; slope:  $P = 0.1358$ ), and the overall accuracy was also similar (Control: 90.4%;  
328 Right-Biased: 91.5%; unpaired two-tail t-test between individual subjects in the two groups:  $P$   
329  $= 0.4599$ ). The difference in motor costs during the action phase did not bias the decisions of  
330 the subjects in our experimental paradigm. One possible reason is that the difference was not  
331 directly related to the final choice; another possibility is that explicit knowledge of the motor  
332 cost would help to avoid integrating irrelevant factors into the decision to maintain high  
333 accuracy [23].

334 We plotted the number of switches made in the trials against trial difficulty (measured  
335 by the absolute difference between the proportions of white dots in the stimuli) in Fig 4B: In  
336 both conditions, the number of switches decreased with trial difficulty (significant slopes in  
337 mixed-effects regression:  $P = 4.8 \times 10^{-10}$  for Control and  $P = 1.9 \times 10^{-8}$  for Right-Biased). There  
338 was no significant difference between the two conditions (intercept:  $P = 0.5216$ ; slope:  $P =$   
339  $0.8516$ ). The motor cost during sampling correlated with the number of switches, therefore we

340 concluded that the more difficult the trials were, the more motor effort would be invested into  
341 the sampling process.

342         Next, we examined the influences of motor cost upon the first and the last sampled  
343 items. Fig 4C shows that the start position and the choice button position both affected the  
344 first sampled item: In the Control condition, subjects tended to sample the item closer to the  
345 start position, which would reduce the first part of the total motor cost. However, we observed  
346 a systematic bias to sample the left item first, which may be related to the cultural habit of  
347 dealing with items in left-to-right order (for example, people usually read from left to right).  
348 In the Right-Biased condition, subjects showed an extra tendency to go for the left item first  
349 (significantly different intercepts:  $P = 2.9 \times 10^{-9}$ ). The subject was most likely to make only  
350 one switch (Fig 3A); in that case, starting from the left item would lead to taking the shorter  
351 path from the right item to the buttons, reducing the last part of the motor effort. In Fig 4D we  
352 plotted the probability of sampling the right item last against the difference between  
353 proportions of white dots in the two stimuli: Generally, subjects were more likely to sample  
354 the stimulus with more white dots last. In the Right-Biased condition, subjects preferred to  
355 sample the right stimulus last (significantly different intercepts:  $P = 2.9 \times 10^{-6}$ ), which would  
356 reduce the motor cost during the action phase.

357

## 358 **Influences of the decision variable on sampling patterns**

359         The last-sampling bias is the phenomenon that subjects are more likely to choose the  
360 last sampled stimulus. Such a bias has been reported in several human decision-making  
361 studies of both preferential and perceptual decisions [15, 17]. However, the causal  
362 relationship behind the last-sampling bias is not completely clear: Do subjects tend to choose  
363 a stimulus because it is the last sampled one, or do they tend to sample the particular stimulus



364 last because they already want to choose it, or both? According to the aDDM, the evidence  
365 accumulation rate for the stimulus not being sampled is discounted, so the decision variable  
366 will be more likely to reach the barrier at the last sampled side [15]. Otherwise, the aDDM  
367 assumes that the current decision variable has no backward influence upon sampling patterns.  
368 There is rare evidence supporting that the temporary decision has a causal effect on the  
369 allocation of attention during sampling [19].

### 370 **Bayesian Network modeling**

371 To study the causal relationship between the last sampled item and the decision, we  
372 built a Bayesian Network model quantifying the size of the last-sampling bias. Fig 5 displays  
373 the graphical models for the networks: Naturally, the final decision depends on the decision  
374 variable. In the One-Switch condition, the last sampled item is the alternative of the first  
375 sampled one, which in turn depends on the motor cost measured by the distance from the start  
376 position to the stimulus. In the Right-Biased condition, the last sampled item depends on the  
377 motor cost in the action stage. Apart from the common dependency structures described  
378 above, there are three possible models with different hypotheses on whether the last sampled  
379 item depends on the decision variable and whether the final choice depends on the last  
380 sampled item:

381

382 **Fig 5. Causal relationship for the last-sampling bias.** Graphical models for possible  
383 hypotheses regarding the conditional dependency relationship between the decision variable  
384 before the last sampling, the last sampled stimulus and the final choice. Arrows show  
385 dependency between the events or variables, and dashed arrows show dependency assumed to  
386 exist generally but absent in the specific experimental condition.

387

388 **Model (a)**

389 Like the aDDM, the first model assumes that the final decision depends on the last  
390 sampled item, but the last sampled item is independent of the decision variable. Therefore, in  
391 the Control condition we have:

$$\begin{aligned} 392 \quad & p(\text{right chosen} | \text{right last sampled}) \\ & = \int p(\text{right chosen} | DV, \text{right last sampled}) p(DV) dDV \end{aligned} \quad (6)$$

393 where  $DV$  is the value of the decision variable exactly before the last sampling epoch starts.  
394  $p(\text{right chosen} | \text{right last sampled})$  measures the size of the last-sampling bias. The bias is due  
395 to the term  $p(\text{right chosen} | DV, \text{right last sampled})$ , which can be regarded as a function of  
396  $DV$ : For each given value of  $DV$ ,  $p(\text{right chosen} | DV, \text{right last sampled}) > p(\text{right chosen} |$   
397  $DV)$ . In the aDDM,  $p(\text{right chosen} | DV, \text{right last sampled})$  is the probability for the decision  
398 variable to drift to the right boundary at the end of the last sampling, decided by the aDDM  
399 parameters ( $d$ ,  $\sigma$  and  $\theta$ ) and the relative values for the two stimuli.

400 In the One-Switch condition, the dependency structure between  $DV$ , the last sampled  
401 item and the final choice remains the same, but the following analysis explains why the size  
402 of the last-sampling bias will increase (see our aDDM simulation results): At the beginning of  
403 each trial, the decision variable is set to 0; as the sampling time elapses, more drift steps ( $v\Delta t$   
404  $+ \varepsilon_i$ ) are added to the decision variable, so its variance increases. When only two sampling  
405 epochs are allowed, the elapsed time before the last sampling is shorter, thus  $p(DV)$  will have  
406 a narrower variance. In that case, the product of a biased  $p(\text{right chosen} | DV, \text{right last}$   
407  $\text{sampled})$  and  $p(DV)$  will be larger than that in the Control condition.

408 In the Right-Biased condition, the value of  $p(\text{right chosen} | \text{right last sampled})$  will not  
409 change because no term in Equation (6) depends on the motor cost to reach for the buttons.

410 **Model (b)**

411 On the contrary, the second model assumes that the last sampled item depends on  $DV$ ,  
412 but the final decision is independent of the last sampled item. Therefore, in the Control  
413 condition,

$$414 \quad \begin{aligned} & p(\text{right chosen} \mid \text{right last sampled}) \\ &= \int p(\text{right chosen} \mid DV) \frac{p(\text{right last sampled} \mid DV)}{p(\text{right last sampled})} p(DV) dDV \end{aligned} \quad (7)$$

415 Under that hypothesis, the last-sampling bias is due to the term  $p(\text{right last sampled} \mid DV)$ ,  
416 which is also a function of  $DV$ : When  $DV > 0$ ,  $p(\text{right last sampled} \mid DV) > p(\text{right last}$   
417  $\text{sampled})$ ; when  $DV < 0$ ,  $p(\text{right last sampled} \mid DV) < p(\text{right last sampled})$ .

418 In the One-Switch condition, the last sampled item no longer depends on  $DV$ , so:

$$419 \quad p(\text{right chosen} \mid \text{right last sampled}) = \int p(\text{right chosen} \mid DV) p(DV) dDV \quad (8)$$

420 Thus  $p(\text{right chosen} \mid \text{right last sampled})$  will fall back to 0.5.

421 In the Right-Biased condition, subjects tend to sample the right item last. We assumed  
422 that such a tendency is independent of  $DV$ , so the probability  $p(\text{right last sampled} \mid DV)$  and  
423  $p(\text{right last sampled})$  will rise by the same additive amount. Compared with the Control  
424 condition, the term  $p(\text{right last sampled} \mid DV)p(\text{right last sampled})^{-1}$  will become smaller  
425 when  $DV > 0$  and larger when  $DV < 0$ , resulting in a decreased size of the last-sampling bias.

#### 426 **Model (c)**

427 This model shows a third possibility that the last sampled item depends on  $DV$ , and  
428 the final decision also depends on the last sampled item. In the Control condition:

$$429 \quad \begin{aligned} & p(\text{right chosen} \mid \text{right last sampled}) \\ &= \int p(\text{right chosen} \mid DV, \text{right last sampled}) \frac{p(\text{right last sampled} \mid DV)}{p(\text{right last sampled})} p(DV) dDV \end{aligned} \quad (9)$$

430 In Equation (9), the total bias in  $p(\text{right chosen} \mid \text{right last sampled})$  has two sources:  $p(\text{right}$   
 431  $\text{chosen} \mid DV, \text{right last sampled})$  and  $p(\text{right last sampled} \mid DV)$ . The last sampled item is more  
 432 likely to be chosen, and the temporarily winning item is more likely to be sampled last.

433 Under such assumptions, the last-sampling bias should remain in the One-Switch  
 434 condition because the term  $p(\text{right chosen} \mid DV, \text{right last sampled})$  is biased, but the size will  
 435 decrease because the term  $p(\text{right last sampled} \mid DV)$  now disappears.

436 In the Right-Biased condition,  $p(\text{right chosen} \mid \text{right last sampled})$  will also become  
 437 smaller similar to that in Model (b).

### 438 Model predictions vs. empirical results

439 Let  $p_{\text{Control}}$ ,  $p_{\text{One-Switch}}$  and  $p_{\text{Right-Biased}}$  denote  $p(\text{right chosen} \mid \text{right last sampled})$  in each  
 440 specific experimental condition. We summarized different model predictions and the  
 441 empirical results in Table 2: Among the three hypotheses, only Model (c) correctly predicted  
 442 the behavioral data. Therefore, we concluded that the causal relationship between sampling  
 443 patterns and the decision is bidirectional.

444

445 **Table 2. Summary of different model predictions about the last-sampling bias and the**  
 446 **empirical results.**

| Model | Predictions                                                                                                                              | Empirical Results |                                                                                                                                                                      |
|-------|------------------------------------------------------------------------------------------------------------------------------------------|-------------------|----------------------------------------------------------------------------------------------------------------------------------------------------------------------|
| (a)   | $p_{\text{Control}} > 0.5$<br>$p_{\text{One-Switch}} > p_{\text{Control}}$ (×)<br>$p_{\text{Right-Biased}} = p_{\text{Control}}$ (×)     |                   | $p_{\text{Control}} > 0.5^{***}$<br>(one-sample t-test, $P = 2.0 \times 10^{-5}$ )<br>$p_{\text{One-Switch}} > 0.5^{**}$<br>(one-sample t-test, $P = 0.0018$ )       |
| (b)   | $p_{\text{Control}} > 0.5$<br>$p_{\text{One-Switch}} = 0.5$ (×)<br>$0.5 < p_{\text{Right-Biased}} < p_{\text{Control}}$                  |                   | $p_{\text{One-Switch}} < p_{\text{Control}}^{***}$<br>(Dunnett's test, $P = 5.9 \times 10^{-4}$ )<br>$p_{\text{Right-Biased}} > 0.5^{**}$                            |
| (c)   | $p_{\text{Control}} > 0.5$<br>$0.5 < p_{\text{One-Switch}} < p_{\text{Control}}$<br>$0.5 < p_{\text{Right-Biased}} < p_{\text{Control}}$ |                   | $p_{\text{Right-Biased}} > 0.5^{**}$<br>(one-sample t-test, $P = 0.0037$ )<br>$p_{\text{Right-Biased}} < p_{\text{Control}}^{**}$<br>(Dunnett's test, $P = 0.0018$ ) |

447

448  $p_{\text{Control}}$ ,  $p_{\text{One-Switch}}$  and  $p_{\text{Right-Biased}}$  denote  $p(\text{right chosen} \mid \text{right last sampled})$  in each  
449 experimental condition. The conditional probability measures the size of the last-sampling  
450 bias, and a value of 0.5 means that there is no bias.  $**P < 0.01$ ,  $***P < 0.001$ . The cross (×)  
451 marks that the prediction contradicted empirical results.

452

### 453 **aDDM simulation**

454 On top of the theoretical Bayesian Network analysis, we also ran an aDDM simulation  
455 to test whether the decision variable can feedback into the sampling patterns. In our  
456 simulations, each sampling epoch was focused alternatively on the two stimuli until it reached  
457 a time limit randomly drawn from a distribution fitted to the empirical data. In the One-  
458 Switch condition, only one switch of attention was allowed. Each simulation ended when one  
459 of the decision boundaries was reached. Therefore, the allocation of attention in the aDDM  
460 was independent of the current decision variable. Fig 6 shows the comparison between  
461 simulated and empirical results:

462

463 **Fig 6. aDDM simulation results vs. empirical data.** (A) Psychometric choice curve in the  
464 Control condition. (B) Number of switches in the Control group against trial difficulty, as  
465 measured by the absolute difference between the proportions of white dots in the stimuli. (C)  
466 Last-sampling bias in the Control group. The horizontal axis shows the difference between the  
467 proportions of white dots between the last sampled stimulus and the other, while the vertical  
468 axis shows the probability of choosing the last sampled stimulus. (D) Psychometric choice  
469 curve in the One-Switch condition. (E) Decision time in the One-Switch group against trial  
470 difficulty. (F) Last-sampling bias in the One-Switch group. Error bars show 95% confidence

471 intervals. Empirical data included 960 trials pooled across 8 subjects in each condition;  
472 simulated data included 960 trials in each condition.

473

474 Firstly, we compared the psychometric choice curves: There was no statistically  
475 significant difference between the psychometric choice curves for the simulations and the  
476 human subjects (intercept:  $P = 0.0679$ ; slope:  $P = 0.0610$ ) in the Control condition (Fig 6A).  
477 In the One-Switch condition, there was no significant difference between the intercepts of the  
478 curves ( $P = 0.7116$ ), but the slope (steepness) for the simulated data was significantly smaller  
479 than that of the empirical data ( $P = 3.2 \times 10^{-4}$ ), meaning that the overall accuracy in the  
480 simulations was lower (Fig 6D). When only one switch was allowed, the choice accuracy of  
481 the simulations reduced from 90.1% to 84.4%, while for the human subjects there was no  
482 significant reduction (unpaired one-tail t-test between individual subjects in the two groups:  $P$   
483 = 0.8082).

484 Next, we compared the number of switches in the Control condition (Fig 6B): There  
485 was no statistically significant difference between the simulated and empirical results  
486 regarding the number of switches against trial difficulty (intercept:  $P = 0.2690$ ; slope:  $P =$   
487  $0.2384$ ). In the One-Switch condition, we compared the decision time instead of the number  
488 of switches (for it is constantly 1): There was no significant difference between the simulated  
489 and empirical results regarding the decision time against trial difficulty ((Fig 6E, intercept:  $P$   
490 = 0.6125; slope:  $P = 0.2257$ ).

491 Finally, we focused on the last-sampling bias: In Fig 6C and 6E, we plotted the  
492 probability of choosing the last sampled item against the difference between the proportions  
493 of white dots between the last sampled stimulus and the other. All the curves had an intercept  
494 larger than 0.5, showing a tendency to choose the last sampled item, but the sizes of the bias  
495 were different: The curve intercept for the simulations was significantly lower than empirical

496 ( $P = 5.8 \times 10^{-4}$ ) in the Control condition and significantly higher than empirical ( $P = 0.0166$ ) in  
497 the One-Switch condition. Denying that subjects would switch back to sample the winning  
498 item but assuming random switches all the while, the aDDM underestimated the last-sampling  
499 bias in the Control condition and overestimated it in the One-Switch condition. The  
500 simulation results matched our Bayesian Network analysis and implied that the current  
501 decision had a causal effect on the sampling patterns.

502

## 503 **Discussion**

504 In summary, the adaptive sampling behavior during perceptual decision-making  
505 exhibited the following patterns: First, the number of switches between the alternatives  
506 correlated with the difficulty of the task: the more difficult the task was, the more times the  
507 stimuli were resampled. Second, the sampling sequence was decided considering the start  
508 position and the choice button position in an attempt to minimize the total motor effort. Third,  
509 attention was biased to the eventually chosen item during the last sampling epoch. Combining  
510 the modeling results, we concluded that both motor cost and the temporary decision have a  
511 causal influence upon the pattern of attention allocation during sampling.

512 Having reviewed recent computational models, behavioral studies and neural  
513 recording results, Wispinski et al. [24] concluded that decision-making is a continuous  
514 process from the presentation of behaviorally relevant options until movement completion.  
515 Previous studies suggested that motor effort related to the action phase can influence the  
516 decision [4-6, 8], and our results provided an extended conclusion that sampling behavior was  
517 also influenced by the motor effort in different stages of the decision-making process. It  
518 supported the idea that sensorimotor aspects should be considered as an actively integrated  
519 part of the decision-making process. Further, several studies focused on the representation of

520 motor effort and how it is related to cost minimization in decision-making as well as motor  
521 control [25, 26]; future studies may quantify the effect of motor cost on sampling behavior  
522 with similar methods.

523         The relationship between attention and eye movement during decision-making has  
524 been studied abundantly [27], but researches highlighting limb and body movements during  
525 the sampling process are rare, even though in naturalistic circumstances such movements  
526 usually cooperate with eye movements to sample relevant information better. In our research,  
527 we designed a paradigm based on computer mouse tracking in which both gaze shift and hand  
528 movement (moving the mouse) were necessary to switch attention between the options.  
529 Although mouse tracking and eye tracking are both commonly applied process tracking  
530 methods in decision-making research, their original purposes are slightly different: While eye  
531 tracking mostly target on attention and information searching strategies, mouse cursor  
532 tracking data reflect more about indecision and momentary preference [28]. In our paradigm,  
533 however, subjects must move the cursor closer to get a better view of each stimulus, as if  
534 approaching a real object to have a better look. In this way, the mouse trajectory can reflect  
535 attention during sampling as eye traces did in previous studies. Moreover, our paradigm can  
536 be applied to study eye-hand cooperation and coordination during decision-making as well.

537         Traditionally, sequential sampling models assume that during decision-making,  
538 subjects sample their options continuously until the relative evidence for one option reaches a  
539 predetermined threshold, and such models capture the speed-accuracy trade-off phenomenon  
540 well [19, 29, 30]. Interestingly, our results showed that subjects would make extra sampling  
541 epochs during which the accuracy of the decision has not been improved significantly. One  
542 possible explanation is that subjects were switching back to the previously sampled stimuli  
543 again to verify their preliminary decision [31]. Similar to other studies [18, 32, 33], we  
544 observed an attentional bias to the finally chosen option during the later sampling epochs.



545 Mullett and Stewart [32] suggested that such a bias may be due to a relative instead of  
546 absolute stopping rule. According to Krajbich [19], even as the decision variable evolves and  
547 one option emerges as the winning one, it is still optimal to continue sampling information  
548 randomly instead of favoring the leading option, since the information from both the winning  
549 and losing options are of equal importance. However, the accuracy of the decision will not  
550 necessarily decrease if the attentional bias happens at the later stage of sampling when the  
551 main task is to validate the decision. This validating phase may be longer for perceptual  
552 decisions, for people tend to respond with more caution in perceptual decisions than in  
553 preferential decisions, especially when the stimuli are ambiguous [34]. Meanwhile, how the  
554 sub-thresholds within the preliminary decision phase and the validating phase are determined  
555 remains to be discussed.

556 Finally, our study provided evidence for the bidirectional causal relationship between  
557 attention and decisions by Bayesian Network modeling. Bayesian Networks have been  
558 customarily applied for probabilistic causal dependence assessment and inference in a wide  
559 range of areas [35], including life science researches [36, 37]. It is capable of depicting and  
560 predicting the conditional dependences between experimental variables through observed  
561 data, thus becomes a beneficial tool for psychological studies. In our study, we listed all  
562 possible network structures corresponding to different hypotheses on the causal relationship  
563 between the last sampled item, the decision variable and the chosen item. Then, we compared  
564 the predicted conditional probability of choosing the last sampled item with empirical data.  
565 Contrary to previous literature [19], our results imply that rather than randomly switching  
566 between the options, attention is drawn to the winning item during sampling. This finding  
567 may lead to some modification to the basic assumptions of the aDDM in the future.

568

## 569 **Acknowledgements**

570 We would like to express our sincere gratitude to Prof. László Mérő's supervision as  
571 well as his support and encouragement. We are also grateful for the help on practical issues  
572 from the Faculty of Education and Psychology ELTE and the kind participation of all the  
573 subjects in the experiments.

574

## 575 **References**

- 576 1. Lepora NF, Pezzulo G. Embodied choice: how action influences perceptual decision  
577 making. *PLoS computational biology*. 2015 Apr 7;11(4):e1004110. doi:  
578 10.1371/journal.pcbi.1004110
- 579 2. Connors BL, Rende R. Embodied Decision-Making Style: Below and Beyond  
580 Cognition. *Frontiers in psychology*. 2018;9. doi: 10.3389/fpsyg.2018.01123
- 581 3. Filimon F, Philiastides MG, Nelson JD, Kloosterman NA, Heekeren HR. How  
582 embodied is perceptual decision making? Evidence for separate processing of  
583 perceptual and motor decisions. *Journal of Neuroscience*. 2013 Jan 30;33(5):2121-36.  
584 doi: 10.1523/JNEUROSCI.2334-12.2013
- 585 4. Aczel B, Szollosi A, Palfi B, Szaszi B, Kieslich PJ. Is action execution part of the  
586 decision-making process? An investigation of the embodied choice hypothesis.  
587 *Journal of Experimental Psychology Learning Memory and Cognition*.  
588 2018;44(6):918-926. doi: 10.1037/xlm0000484
- 589 5. Marcos E, Cos I, Girard B, Verschure PF. Motor cost influences perceptual decisions.  
590 *PLoS One*. 2015 Dec 16;10(12):e0144841. doi: 10.1371/journal.pone.0144841
- 591 6. Hagura N, Haggard P, Diedrichsen J. Perceptual decisions are biased by the cost to act.  
592 *Elife*. 2017 Feb 21;6:e18422. doi: 10.7554/eLife.18422

- 593       **7.** de Lange FP, Fritsche M. Perceptual decision-making: picking the low-hanging fruit?  
594           Trends in cognitive sciences. 2017 May 1;21(5):306-7. doi: 10.1016/j.tics.2017.03.006
- 595       **8.** Burk D, Ingram JN, Franklin DW, Shadlen MN, Wolpert DM. Motor effort alters  
596           changes of mind in sensorimotor decision making. PLoS One. 2014 Mar  
597           20;9(3):e92681. doi: 10.1371/journal.pone.0092681
- 598       **9.** Harris CM, Wolpert DM. The main sequence of saccades optimizes speed-accuracy  
599           trade-off. Biological cybernetics. 2006 Jul 1;95(1):21-9. doi: 10.1007/s00422-006-  
600           0064-
- 601       **10.** Armel KC, Beaumel A, Rangel A. Biasing simple choices by manipulating relative  
602           visual attention. Judgment and Decision making. 2008;3(5):396-403.
- 603       **11.** Lim SL, O'Doherty JP, Rangel A. The decision value computations in the vmPFC and  
604           striatum use a relative value code that is guided by visual attention. Journal of  
605           Neuroscience. 2011 Sep 14;31(37):13214-23. doi: 10.1523/JNEUROSCI.1246-  
606           11.2011
- 607       **12.** Atalay AS, Bodur HO, Rasolofoarison D. Shining in the center: Central gaze cascade  
608           effect on product choice. Journal of Consumer Research. 2012 May 3;39(4):848-66.  
609           doi: 10.1086/665984
- 610       **13.** Bird GD, Lauwereyns J, Crawford MT. The role of eye movements in decision  
611           making and the prospect of exposure effects. Vision Research. 2012 May 1;60:16-21.  
612           doi: 10.1016/j.visres.2012.02.014
- 613       **14.** Kunar MA, Watson DG, Tsetsos K, Chater N. The influence of attention on value  
614           integration. Attention, Perception, & Psychophysics. 2017 Aug 1;79(6):1615-27. doi:  
615           10.3758/s13414-017-1340-7

- 616 **15.** Krajbich I, Armel C, Rangel A. Visual fixations and the computation and comparison  
617 of value in simple choice. *Nature neuroscience*. 2010 Oct;13(10):1292. doi:  
618 10.1038/nn.2635
- 619 **16.** Krajbich I, Rangel A. Multialternative drift-diffusion model predicts the relationship  
620 between visual fixations and choice in value-based decisions. *Proceedings of the*  
621 *National Academy of Sciences*. 2011 Aug 16;108(33):13852-7. doi:  
622 10.1073/pnas.1101328108
- 623 **17.** Tavares G, Perona P, Rangel A. The attentional drift diffusion model of simple  
624 perceptual decision-making. *Frontiers in neuroscience*. 2017 Aug 24;11:468. doi:  
625 10.3389/fnins.2017.00468
- 626 **18.** Shimojo S, Simion C, Shimojo E, Scheier C. Gaze bias both reflects and influences  
627 preference. *Nature neuroscience*. 2003 Dec;6(12):1317. doi: 10.1038/nn1150
- 628 **19.** Krajbich I. Accounting for attention in sequential sampling models of decision making.  
629 *Current opinion in psychology*. 2018 Oct 13. doi: 10.1016/j.copsyc.2018.10.008
- 630 **20.** Gottlieb J. Understanding active sampling strategies: Empirical approaches and  
631 implications for attention and decision research. *Cortex*. 2018 May 1;102:150-60. doi:  
632 10.1016/j.cortex.2017.08.019
- 633 **21.** Ludwig CJ, Evens DR. Information foraging for perceptual decisions. *Journal of*  
634 *Experimental Psychology: Human Perception and Performance*. 2017 Feb;43(2):245.  
635 doi: 10.1037/xhp0000299
- 636 **22.** Smith SM, Krajbich I. Gaze amplifies value in decision making. *Psychological science*.  
637 2019 Jan;30(1):116-28. doi: 10.1177/0956797618810521
- 638 **23.** Hagura N, Diedrichsen J, Haggard P. Action cost biases the perceptual decision  
639 making, only when the cost is implicit. *Translational and Computational Motor*  
640 *Control*, 2013.

- 641       **24.** Wispinski NJ, Gallivan JP, Chapman CS. Models, movements, and minds: bridging  
642       the gap between decision making and action. *Annals of the New York Academy of*  
643       *Sciences*. 2018 Oct 1. doi: 10.1111/nyas.13973
- 644       **25.** Shadmehr R, Huang HJ, Ahmed AA. A representation of effort in decision-making  
645       and motor control. *Current biology*. 2016 Jul 25;26(14):1929-34. doi:  
646       10.1016/j.cub.2016.05.065
- 647       **26.** Morel P, Ulbrich P, Gail A. What makes a reach movement effortful? Physical effort  
648       discounting supports common minimization principles in decision making and motor  
649       control. *PLoS biology*. 2017 Jun 6;15(6):e2001323. doi:  
650       10.1371/journal.pbio.2001323
- 651       **27.** Orquin JL, Loose SM. Attention and choice: A review on eye movements in decision  
652       making. *Acta psychologica*. 2013 Sep 1;144(1):190-206. doi:  
653       10.1016/j.actpsy.2013.06.003
- 654       **28.** Schulte-Mecklenbeck M, Johnson JG, Böckenholt U, Goldstein DG, Russo JE,  
655       Sullivan NJ, Willemsen MC. Process-tracing methods in decision making: On  
656       growing up in the 70s. *Current Directions in Psychological Science*. 2017  
657       Oct;26(5):442-50. doi: 10.1177/0963721417708229
- 658       **29.** Heitz RP. The speed-accuracy tradeoff: history, physiology, methodology, and  
659       behavior. *Frontiers in neuroscience*. 2014 Jun 11;8:150. doi:  
660       10.3389/fnins.2014.00150
- 661       **30.** Forstmann BU, Ratcliff R, Wagenmakers EJ. Sequential sampling models in cognitive  
662       neuroscience: Advantages, applications, and extensions. *Annual review of psychology*.  
663       2016 Jan 4;67:641-66. doi: 10.1146/annurev-psych-122414-033645

- 664       **31.** Cassey TC, Evens DR, Bogacz R, Marshall JA, Ludwig CJ. Adaptive sampling of  
665       information in perceptual decision-making. *PloS one*. 2013 Nov 27;8(11):e78993. doi:  
666       10.1371/journal.pone.0078993
- 667       **32.** Mullett TL, Stewart N. Implications of visual attention phenomena for models of  
668       preferential choice. *Decision*. 2016 Oct;3(4):231. doi: 10.1037/dec0000062
- 669       **33.** Onuma T, Penwannakul Y, Fuchimoto J, Sakai N. The effect of order of dwells on the  
670       first dwell gaze bias for eventually chosen items. *PloS one*. 2017 Jul  
671       19;12(7):e0181641. doi: 10.1371/journal.pone.0181641
- 672       **34.** Dutilh G, Rieskamp J. Comparing perceptual and preferential decision making.  
673       *Psychonomic bulletin & review*. 2016 Jun 1;23(3):723-37. doi: 10.3758/s13423-015-  
674       0941-1
- 675       **35.** Heckerman D, Breese JS. Causal independence for probability assessment and  
676       inference using Bayesian networks. *IEEE Transactions on Systems, Man, and*  
677       *Cybernetics-Part A: Systems and Humans*. 1996 Nov;26(6):826-31. doi:  
678       10.1109/3468.541341
- 679       **36.** Friedman N. Inferring cellular networks using probabilistic graphical models. *Science*.  
680       2004 Feb 6;303(5659):799-805. doi: 10.1126/science.1094068
- 681       **37.** Yu J, Smith VA, Wang PP, Hartemink AJ, Jarvis ED. Advances to Bayesian network  
682       inference for generating causal networks from observational biological data.  
683       *Bioinformatics*. 2004 Jul 29;20(18):3594-603. doi: 10.1093/bioinformatics/bth448

684

## 685 **Supporting information**

686 **S1 Supporting Information. Mathematical details of the Bayesian Network modeling.**

687 **S2 Video. Demo trials recorded from the screen.**

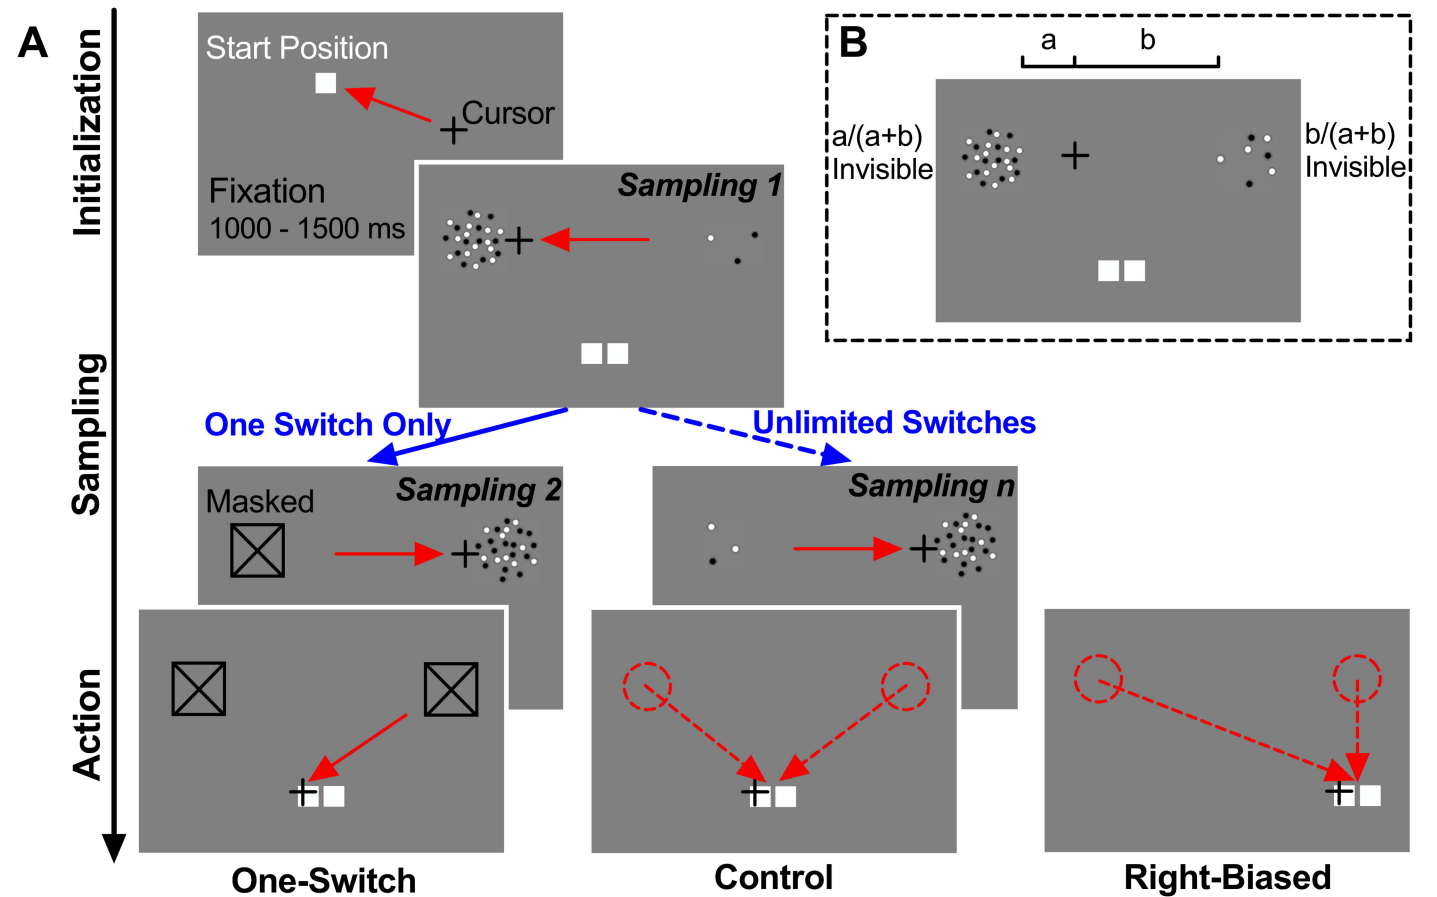

**Trials (Sorted by Start Position)**

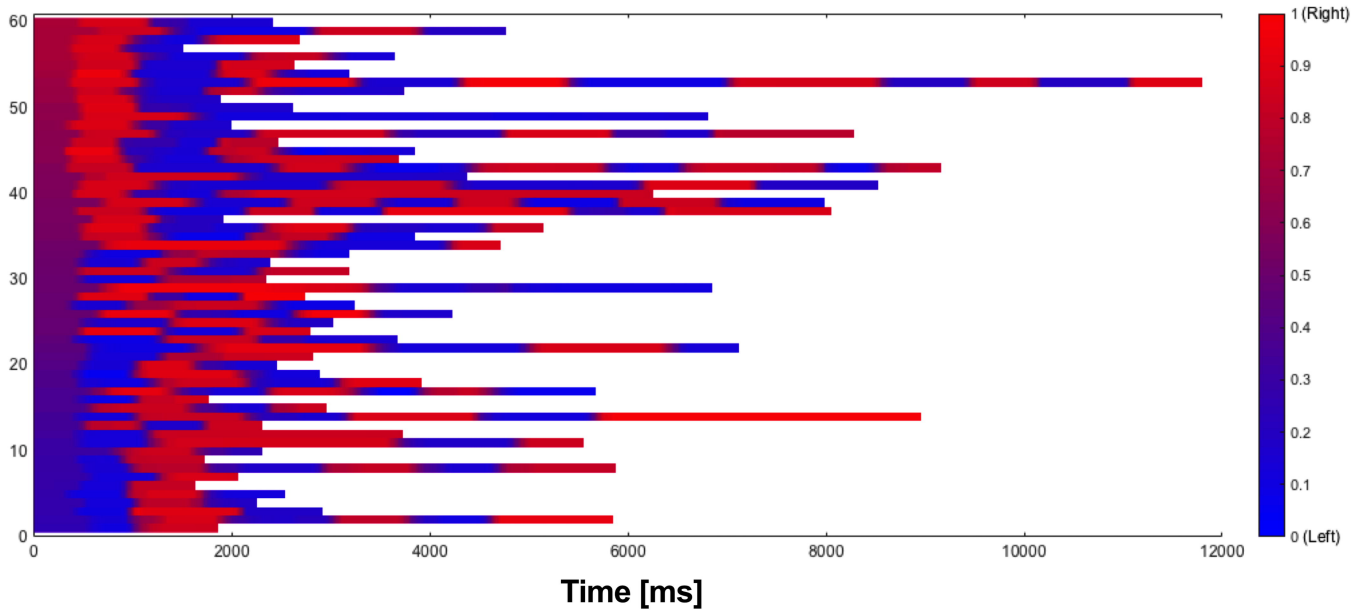



**A**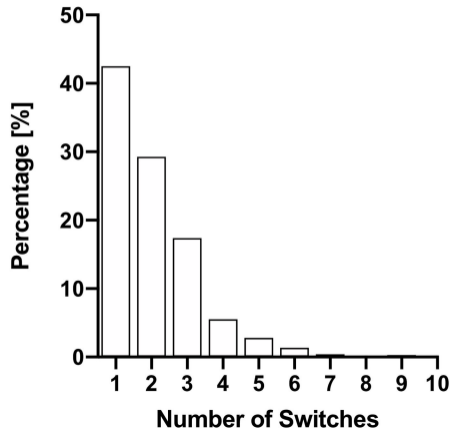**B**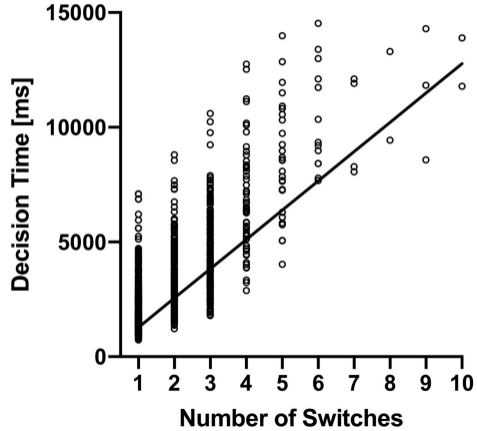**C**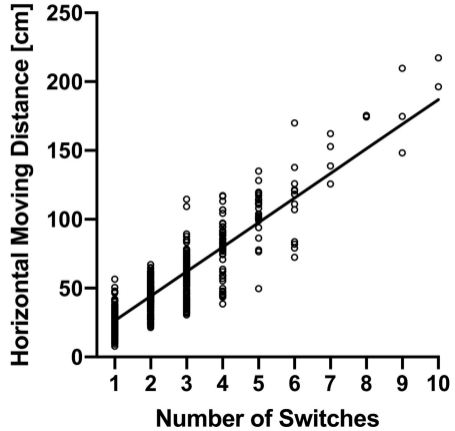

**A**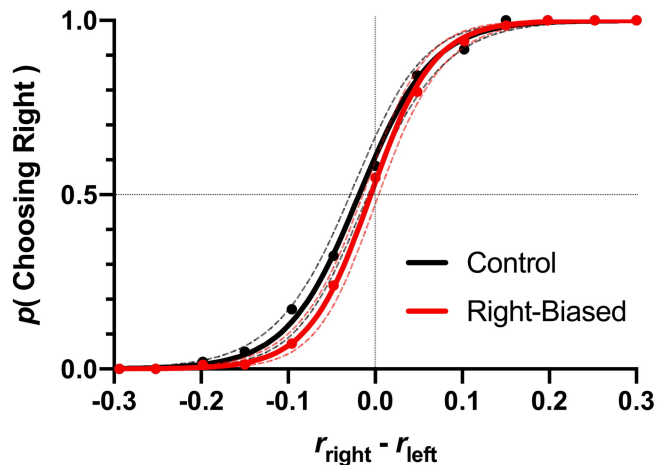**B**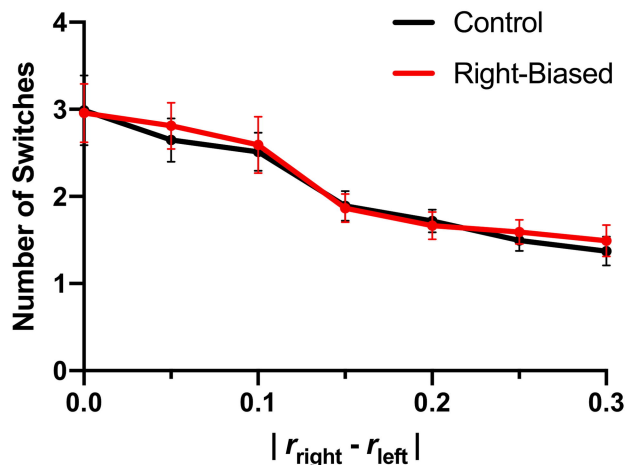**C**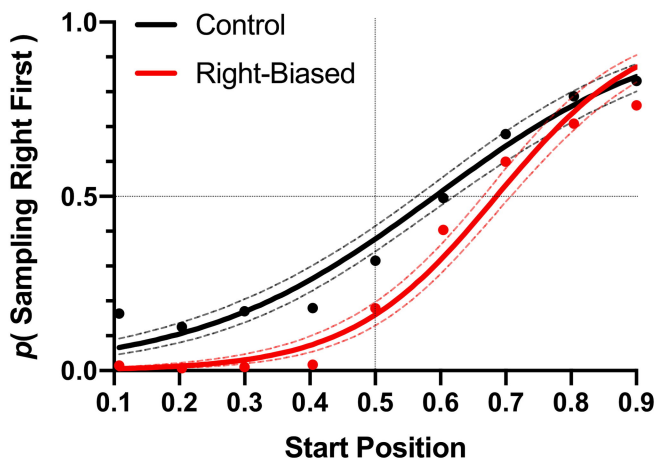**D**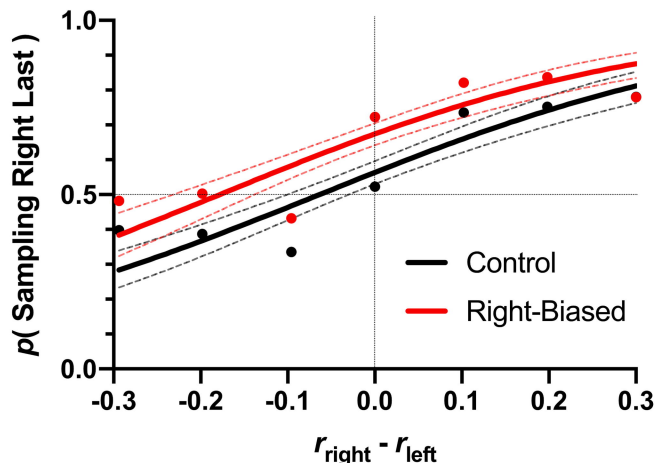

## Control

## One-Switch

## Right-Biased

**Model (a)**

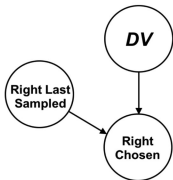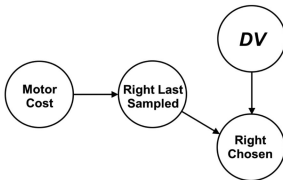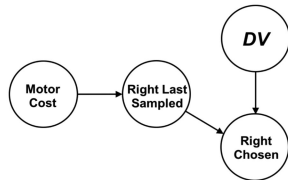

**Model (b)**

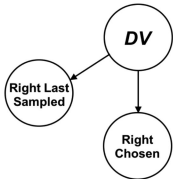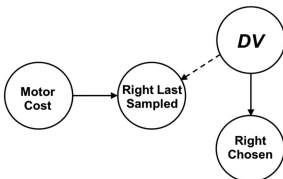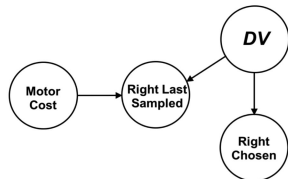

**Model (c)**

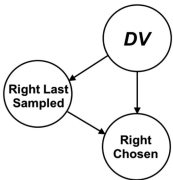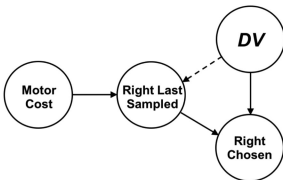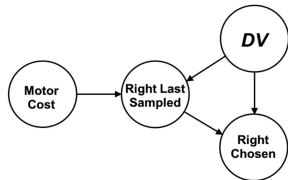

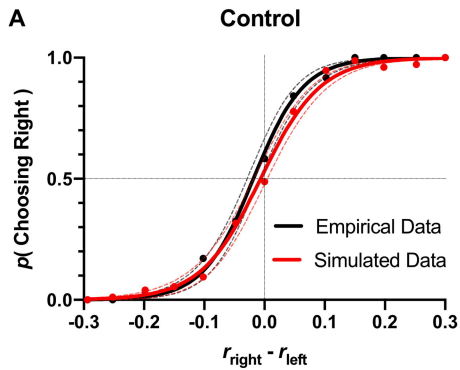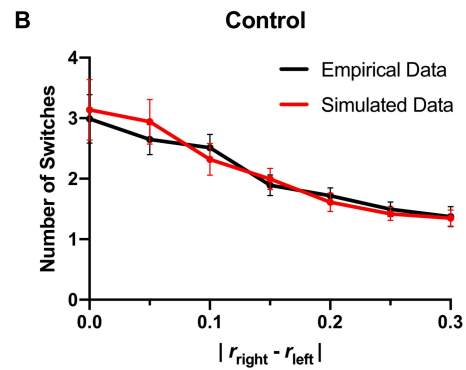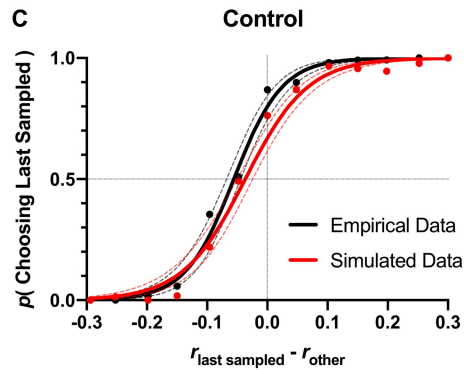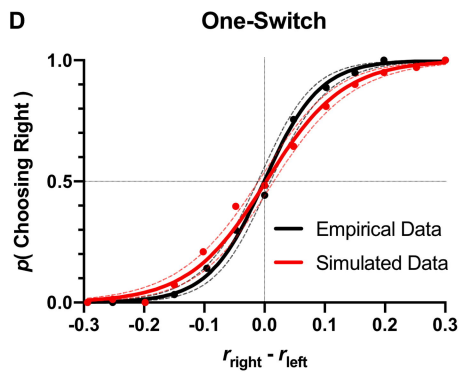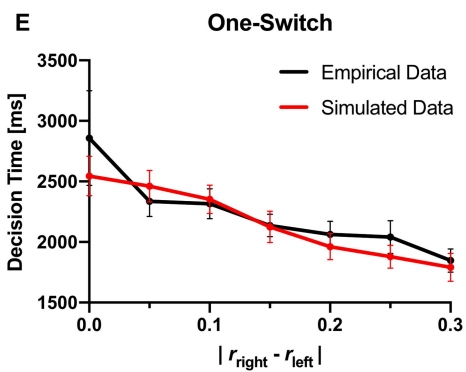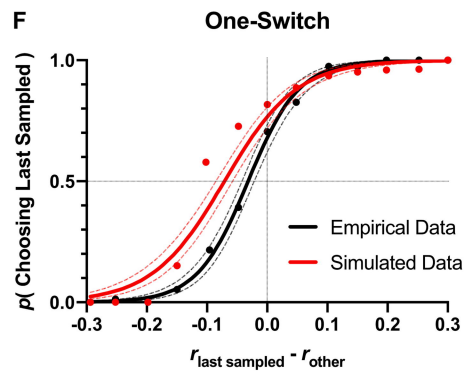

Source: https://www.biorxiv.org/content/10.1101/637017v2.full.pdf
